# Supplementary material for: Association of different kinds of obesity with diabetic retinopathy in patients with type 2 diabetes
Source: PubMed Central journal article supplement — BMJ Open. 2022 May 19;12(5):e056332. doi: 10.1136/bmjopen-2021-056332 (PMC9121435; doi:10.1136/bmjopen-2021-056332), 2022-05-19
Supplement: bmjopen-2021-056332.draft_revisions.pdf [file bmjopen-2021-056332.draft_revisions.pdf]

# BMJ Open

BMJ Open is committed to open peer review. As part of this commitment we make the peer review history of every article we publish publicly available.

When an article is published we post the peer reviewers' comments and the authors' responses online. We also post the versions of the paper that were used during peer review. These are the versions that the peer review comments apply to.

The versions of the paper that follow are the versions that were submitted during the peer review process. They are not the versions of record or the final published versions. They should not be cited or distributed as the published version of this manuscript.

BMJ Open is an open access journal and the full, final, typeset and author-corrected version of record of the manuscript is available on our site with no access controls, subscription charges or pay-per-view fees (<http://bmjopen.bmj.com>).

If you have any questions on BMJ Open's open peer review process please email [info.bmjopen@bmj.com](mailto:info.bmjopen@bmj.com)

# BMJ Open

## Association of Different Kinds of Obesity with Diabetic Retinopathy in Patients with Type 2 Diabetes

|                               |                                                                                                                                                                                           |
|-------------------------------|-------------------------------------------------------------------------------------------------------------------------------------------------------------------------------------------|
| Journal:                      | <i>BMJ Open</i>                                                                                                                                                                           |
| Manuscript ID                 | bmjopen-2021-056332                                                                                                                                                                       |
| Article Type:                 | Original research                                                                                                                                                                         |
| Date Submitted by the Author: | 22-Aug-2021                                                                                                                                                                               |
| Complete List of Authors:     | Li, Wangting<br>Gong, Xia<br>Wang, Wei<br>Xiong, Kun<br>Meng, Jie<br>Li, Yuting<br>Wang, Lanhua<br>Liang, Xiaoling<br>Huang, Wenyong; Sun Yat-Sen University Zhongshan Ophthalmic Center, |
| Keywords:                     | Diabetic retinopathy < DIABETES & ENDOCRINOLOGY, DIABETES & ENDOCRINOLOGY, NUTRITION & DIETETICS                                                                                          |
|                               |                                                                                                                                                                                           |

SCHOLARONE™  
Manuscripts

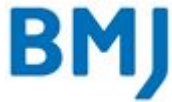

I, the Submitting Author has the right to grant and does grant on behalf of all authors of the Work (as defined in the below author licence), an exclusive licence and/or a non-exclusive licence for contributions from authors who are: i) UK Crown employees; ii) where BMJ has agreed a CC-BY licence shall apply, and/or iii) in accordance with the terms applicable for US Federal Government officers or employees acting as part of their official duties; on a worldwide, perpetual, irrevocable, royalty-free basis to BMJ Publishing Group Ltd ("BMJ") its licensees and where the relevant Journal is co-owned by BMJ to the co-owners of the Journal, to publish the Work in this journal and any other BMJ products and to exploit all rights, as set out in our [licence](#).

The Submitting Author accepts and understands that any supply made under these terms is made by BMJ to the Submitting Author unless you are acting as an employee on behalf of your employer or a postgraduate student of an affiliated institution which is paying any applicable article publishing charge ("APC") for Open Access articles. Where the Submitting Author wishes to make the Work available on an Open Access basis (and intends to pay the relevant APC), the terms of reuse of such Open Access shall be governed by a Creative Commons licence – details of these licences and which [Creative Commons](#) licence will apply to this Work are set out in our licence referred to above.

Other than as permitted in any relevant BMJ Author's Self Archiving Policies, I confirm this Work has not been accepted for publication elsewhere, is not being considered for publication elsewhere and does not duplicate material already published. I confirm all authors consent to publication of this Work and authorise the granting of this licence.

1  
2  
3  
4 1 **Title Page**

5  
6 2 **Association of Different Kinds of Obesity with Diabetic Retinopathy in Patients**  
7  
8  
9 3 **with Type 2 Diabetes**

10  
11 4  
12  
13  
14 5 Wangting Li, M.D.<sup>1,\*</sup>; Xia Gong, M.D.<sup>1,\*</sup>; Wei Wang, M.D., Ph.D.<sup>1,&</sup>; Kun Xiong, M.D.<sup>1</sup>; Jie  
15  
16  
17 6 Meng, M.D.<sup>1</sup>; Yuting Li, M.D., Lanhua Wang, M.D., Ph.D.<sup>1</sup>; M.P.H.<sup>1</sup>; Xiaoling Liang, M.D.,  
18  
19 7 Ph.D.<sup>1</sup>; Wenyong Huang, M.D., Ph.D.<sup>1,&#</sup>

20  
21  
22  
23  
24  
25 9 Institutions:

26  
27 10 <sup>1</sup> State Key Laboratory of Ophthalmology, Zhongshan Ophthalmic Center, Sun Yat-sen  
28  
29  
30 11 University, Guangzhou, Guangdong, 510000, People's Republic of China.

31  
32 12 \* Co-first author

33  
34  
35 13 & Co-senior author

36  
37  
38 14 # Correspondence: Wenyong Huang, M.D., Ph.D.

39  
40 15 Professor of Ophthalmology, Vice director of the Department of Preventive Ophthalmology,  
41  
42  
43 16 Zhongshan Ophthalmic Center, State Key Laboratory of Ophthalmology, Sun Yat-sen  
44  
45 17 University, Guangzhou, China, 510000, Email: [huangwenyong@gzzoc.com](mailto:huangwenyong@gzzoc.com)

46  
47  
48 18 Word count for text: 2649  
49  
50  
51  
52  
53  
54  
55  
56  
57  
58  
59  
60

1  
2  
3  
4 **19 Abstract**

5  
6 **20 Introduction** Although obesity is one of the established risk factors of diabetes mellitus, the

7  
8  
9 21 relationship between obesity and diabetic retinopathy (DR) remains unclear in different studies. We

10  
11 22 aimed to investigate the prevalence of obesity, and analyze the association of four obesity-related

12  
13  
14 23 indexes, including body mass index(BMI), waist to hip ratio(WHR), waist to height ratio(WHtR) and

15  
16  
17 24 body adiposity index(BAI), with diabetic retinopathy (DR) in diabetic patients.

18  
19  
20 25 **Research Design and Methods** We prospectively enrolled 2305 diabetic patients (2305 eyes) in

21  
22 26 Guangzhou Diabetic Eye Study (GDES) between Nov2017 and Dec 2019 to investigate the prevalence

23  
24  
25 27 and the association of different types of obesity with DR using BMI, WHR, WHtR and BAI. DR,

26  
27  
28 28 diabetic macular edema (DME) and vision-threatening diabetic retinopathy(VTDR) were selected as

29  
30 29 primary outcomes. BMI was categorized as normal (18.5-22.9kg/m<sup>2</sup>), overweight(23.0-25.0kg/m<sup>2</sup>), and

31  
32  
33 30 obese(>25.0kg/m<sup>2</sup>); WHR, WHtR and BAI were categorized into quarters.

34  
35  
36 31 **Research Design and Methods** A total of 1562(67.8%) participants were overweight or obese. The

37  
38 32 prevalence of DR, DME and VTDR was higher in patients with higher BMI/WHR or lower WHtR/BAI.

39  
40  
41 33 In the univariate regression model, WHR correlated positively with DR, while WHtR and BAI

42  
43  
44 34 correlated negatively with DR, DME and VTDR. The association remained independent of age, sex and

45  
46  
47 35 lipid metabolism parameters. In the multivariate model, obese presented as a protective factor for DME

48  
49  
50 36 and VTDR, while the second quarter of WHtR(Q2-WHtR) presented as a risk factor. However, the

51  
52  
53 37 association was significant only in female patients, but not male patients.

54  
55  
56 38 **Conclusions** As high as 67.8% diabetic patients were overweight or obese. Obese presented as a

57  
58  
59 39 significant protective factor of VTDR, while Q2-WHtR presented as a significant risk factor. Therefore,

60

1  
2  
3  
4 40 more attention should be paid to centripetal obesity as well as general obesity. Further research is also  
5  
6  
7 41 needed to focus on the improvement of sex-specific weight management in diabetic patients.  
8  
9 42 **Keywords** Diabetes mellitus, diabetic retinopathy, obesity, BMI, WHR, WHtR, BAI  
10  
11  
12  
13

14 **Article summary: (Strengths and limitations of this study)**  
15

- 16  
17 • This study is a combined study that analyzed the association of four obesity-related  
18  
19 indexes (BMI, WHR, WHtR, and BAI) with the presence and the severity of diabetic  
20  
21 retinopathy.  
22  
23
- 24  
25 • The data enrolled 2305 type 2 diabetes mellites (T2DM) patients who participated in the  
26  
27 Guangzhou Diabetic Eye Study in China.  
28  
29
- 30  
31 • Any diabetic retinopathy, diabetic macular edema (DME), and vision-threatening diabetic  
32  
33 retinopathy (VTDR) were selected as primary outcomes.  
34  
35
- 36  
37 • It is the first study to analyze the association between BAI and DR.  
38  
39
- 40  
41 • We are collecting follow-up data to further prospectively analyze the relationship between  
42  
43 obesity and diabetic retinopathy.  
44  
45  
46  
47  
48  
49  
50  
51  
52  
53  
54  
55  
56  
57  
58  
59  
60

## 43 **Introduction**

44 Diabetic retinopathy (DR) is one of the most common complications of diabetes mellitus  
45 and is a leading cause of vision loss and blindness throughout the world<sup>1</sup>. It severely affects the  
46 life quality of diabetic patients and increases the economic burden of treatment without timely  
47 management<sup>1</sup>. Although obesity is one of the established risk factors that correlated positively  
48 with diabetes mellitus<sup>2,3</sup>, the relationship between obesity and DR varies in different studies.  
49 For instance, in a cross-sectional study that enrolled 50,464 Saudi diabetic patients, overweight  
50 and obesity presented as a protective factor for DR<sup>4</sup>. However, in a meta-analysis of prospective  
51 cohort studies, obesity correlated with a significant increase in DR incidence<sup>5</sup>. The methods to  
52 improve the weight management of diabetic patients to decrease the presence and severity of  
53 DR have become a major public health problem.

54 Body mass index (BMI) has been commonly used to assess weight level in the previous  
55 study<sup>4,6,7</sup>, but it could not distinguish whether a patient is general obese or abdominal obese. To  
56 solve the problem, waist to hip ratio (WHR) and waist to height ratio (WHtR) are developed to  
57 assess centripetal obesity, while body adiposity index (BAI) is established and has a significant  
58 linear relationship with body fat rate<sup>8</sup>. However, combined or separate studies about association  
59 of WHR, WHtR, and BAI with DR are still limited. Studies to explore the relationship between  
60 obesity and DR among Chinese people are also limited.

61 Therefore, in this study, any DR, diabetic macular edema (DME), and vision-threatening  
62 diabetic retinopathy (VTDR) were selected as primary outcomes. We used the data of 2305  
63 type 2 diabetes mellites (T2DM) patients who participated in the Guangzhou Diabetic Eye  
64 Study, and analyzed the association of four obesity-related indexes (BMI, WHR, WHtR, and

1  
2  
3  
4 65 BAI) with the presence and the severity of DR.  
5  
6

7 66  
8

## 9 67 **Methods**

### 10 11 68 **Study design and participants**

12  
13  
14 69 The Guangzhou Diabetic Eye Study (GDES) is an ongoing prospective study that enrolled  
15  
16  
17 70 diabetes patients from communities in Guangzhou. Before enrollment, the participants were  
18  
19  
20 71 diagnosed with diabetes in the general hospitals, and were registered and followed up in the  
21  
22  
23 72 community health centers. They were referred to Zhongshan Ophthalmic Center and underwent  
24  
25 73 ophthalmic examinations and physical examinations at the baseline visit, one-year visit, and  
26  
27 74 two-year visit. Demographic information and medical history were also collected at the same  
28  
29  
30 75 time. All the participants were free from cognitive impairments. They were able to conduct  
31  
32  
33 76 normal conservations and lived independently in the community.

34  
35 77 A total of 2372 diabetic patients participated and completed the examinations between  
36  
37  
38 78 Nov 2017 and Dec 2019. Sixty-seven participants with ungradable fundus images were  
39  
40  
41 79 excluded, and 2305 participants were finally included. The baseline data of demographic  
42  
43  
44 80 information, medical history, ophthalmic examinations, and physical examinations were  
45  
46  
47 81 extracted in the analysis. There was no missing data in the study.

48  
49 82 This study followed the tenets of the Declaration of Helsinki and was approved by the  
50  
51  
52 83 Institutional Review Board of Zhongshan Ophthalmic Center (IRB-ZOC), Guangzhou, China.  
53  
54  
55 84 Written informed consent was obtained from all participants. Patient records and information  
56  
57  
58 85 were anonymized and de-identified before analysis.

### 59 86 **Demographic information, medical history, and biometric parameter assessment**

60



1  
2  
3  
4 87 Demographic information and medical history (e.g., age, sex, education, smoking and  
5  
6 88 drinking history, duration of diabetes, and insulin use) were collected using a standardized  
7  
8  
9 89 questionnaire. The previous medical records would be checked and confirmed by the doctors.  
10  
11 90 The physical examination, including a blood pressure test, blood test, biochemical test, and  
12  
13  
14 91 urine test, was carried out by a certified nurse.

#### 17 92 **Assessment of BMI, WHR, WHtR, and BAI**

19 93 The participants' weight (in kilograms), height (in meters), waist circumference (in  
20  
21  
22 94 centimeters), and hip circumference were measured by certified nurses. Participants were  
23  
24  
25 95 required to remove their shoes and the heavy object (e.g., mobile phones, keys, and wallets) on  
26  
27  
28 96 them. Weight was measured using a weight scale. Height was measured using a measuring stick  
29  
30  
31 97 on the weight scale. Waist and hip circumferences were assessed using a nonstretchable medical  
32  
33  
34 98 tape. Waist circumference was taken at the smallest horizontal girth between the costal margins  
35  
36  
37 99 and the iliac crests at the end of tidal expiration. Hip circumference was taken at the maximal  
38  
39  
40 100 protuberance of the buttocks. Every participant underwent the weight and height measurement,  
41  
42  
43 101 while 483 consecutive participants underwent hip circumference measurement, and 1484  
44  
45  
46 102 consecutive participants underwent waist circumference measurement.

47 103 BMI was calculated as weight divided by height squared and was categorized into normal  
48  
49 104 weight (18.5-22.9 kg/m<sup>2</sup>), overweight (23.0-25.0 kg/m<sup>2</sup>), and obese (>25.0 kg/m<sup>2</sup>), according  
50  
51 105 to Asia-Pacific BMI cutoff points<sup>9-11</sup>. Sixty underweight participants (BMI <18.5 kg/m<sup>2</sup>) were  
52  
53  
54 106 not included because of the small sample size. WHR was calculated as waist circumference  
55  
56  
57 107 divided by hip circumference, while WHtR was calculated by dividing waist circumference by  
58  
59 108 height. BAI was calculated as hip circumference divided by (height)<sup>1.5</sup> minus 18. Because of  
60

1  
2  
3  
4 109 the lack of standardized classifications, WHR, WHtR, and BAI were categorized in quarters.  
5

6  
7 **110 Assessment of DR, DME, and VTDR**  
8

9 111 All the participants underwent ophthalmic examinations including vision test, intraocular  
10  
11 112 pressure test, anterior segment examination, intraocular lens (IOL) master test, mydriatic  
12  
13 113 fundus photography, and optical coherence tomography examination, by trained  
14  
15 114 ophthalmologists.  
16  
17

18  
19 115 DR and DME were diagnosed and graded according to the International Clinical Severity  
20  
21 116 Scale of Diabetic Retinopathy and Diabetic Macular Edema (Figure 1), using 7-position fundus  
22  
23 117 photos of participants. Any DR, DME, and VTDR were selected as primary outcomes. Any DR  
24  
25 118 was defined as the presence of mild non-proliferative diabetic retinopathy (NPDR), moderate  
26  
27 119 NPDR, severe NPDR, or PDR. VTDR was defined as the presence of DME or PDR. For each  
28  
29 120 participant, only the data of the worse eye would be used. If the DR grades of both eyes were  
30  
31 121 consistent, then the right eye would be selected for analysis.  
32  
33  
34  
35  
36

37  
38 **122 Statistical analysis**  
39

40 123 All analyses were performed using STATA statistical software (Stata version 14.0, Stata  
41  
42 124 Corp., College Station, TX). BMI, WHR, WHtR, and BAI classifications were used as both  
43  
44 125 continuous variables and categorical variables. To compare the differences in characteristics of  
45  
46 126 participants with or without DR, DME, and VTDR, the Mann-Whitney U test was used for  
47  
48 127 continuous variables, and the Chi-square test was used for categorical variables.  
49  
50  
51

52  
53 128 The binary and ordinal logistic regression model was used to assess the association of BMI,  
54  
55 129 WHR, WHtR, and BAI with the presence of any DR and VTDR. In special, the outcome of the  
56  
57 130 ordinal logistic regression model of DR was set as no DR, mild NPDR, moderate NPDR, and VTDR  
58  
59  
60

1  
2  
3  
4 131 (including PDR and DME). In the multivariate logistic model, the association was adjusted for  
5  
6  
7 132 potential confounding factors established in previous research. These factors included continuous  
8  
9 133 variables (e.g., age, systolic blood pressure, HbA1c, c-reaction protein, total cholesterol, triglycerides,  
10  
11 134 low-density cholesterol, high-density cholesterol, creatinine, microalbuminuria, uric acid, and axial  
12  
13  
14 135 length) and categorical variables (e.g., sex, smoking history, drinking history, education, duration of  
15  
16  
17 136 diabetes, and insulin use). P values less than 0.05 were considered statistically significant.

### 137 **Patient and public involvement statement**

138 Patients and the public were not involved in the development of this research cohort.

### 139 **Results**

140 In general, 336 (14.58%) participants developed DR, including 76 (3.30%) patients with  
141 mild NPDR, 197 (8.55%) patients with moderate NPDR, 45 (1.95%) patients with severe  
142 NPDR, 17 (0.74%) patients with PDR, and 93 (4.03%) patients with DME. 98 (4.25%) patients  
143 developed VTDR.

144 Compared with participants who did not have DR, participants with DR had a younger  
145 age, a lower level of education, a longer duration of diabetes, and a higher proportion of males,  
146 smoking history, drinking history, and insulin use (Table 1). They also had a higher level of  
147 HbA1c, creatinine, microalbuminuria, and systolic blood pressure, but shorter axis length (all p  
148 <0.05). Moreover, their BMI, WHR, WHtR, and BAI were higher. According to Asia-Pacific  
149 BMI cutoff points, as high as 947 participants (41.1%) were obese, and 615 (26.7%) were  
150 overweight, while only 683 participants (29.6%) were normal weight.

### 151 **Association of BMI with any DR, DME and VTDR**

152 The prevalence of any DR, DME and VTDR in overweight diabetic patients was higher

**Table 1. The characteristics of participants with or without diabetic retinopathy (DR), diabetic macular edema (DME) and vision threatening diabetic retinopathy (VTDR).** Footnotes: BMI: Body mass index. WHR: Waist to hip ratio. WHtR: waist to height ratio. BAI: Body adiposity index.

|                            | DR<br>n=336 | No DR<br>n=1970 | DME<br>n=93 | No DME<br>n=2212 | VTDR<br>n=98 | No VTDR<br>n=2207 |
|----------------------------|-------------|-----------------|-------------|------------------|--------------|-------------------|
| Medical history            |             |                 |             |                  |              |                   |
| Age, median (IQR), year    | 64.0(10.0)  | 65.0(10.0)      | 62.0(9.0)   | 65.0(10.0)       | 61.5(9.0)    | 65.0(10.0)        |
| Sex, %                     |             |                 |             |                  |              |                   |
| Female                     | 49.4        | 58.35           | 43.01       | 57.64            | 42.86        | 57.68             |
| Male                       | 50.6        | 41.65           | 56.99       | 42.36            | 57.14        | 42.32             |
| Smoking history, %         |             |                 |             |                  |              |                   |
| No                         | 81.88       | 86.29           | 83.12       | 85.76            | 82.5         | 85.79             |
| Yes                        | 18.12       | 13.71           | 16.88       | 14.24            | 17.5         | 14.21             |
| Drinking history, %        |             |                 |             |                  |              |                   |
| No                         | 88.04       | 91.18           | 89.61       | 90.78            | 87.5         | 90.87             |
| Yes                        | 11.96       | 8.82            | 10.39       | 9.22             | 12.5         | 9.13              |
| Education, %               |             |                 |             |                  |              |                   |
| Educated                   | 16.42       | 11.26           | 16          | 11.83            | 15.09        | 11.85             |
| Not educated               | 83.58       | 88.74           | 84          | 88.17            | 84.91        | 88.15             |
| Diabetes duration, %, year |             |                 |             |                  |              |                   |
| <5                         | 18.15       | 39.21           | 21.51       | 36.75            | 20.41        | 36.84             |
| 5-9                        | 20.24       | 26.16           | 17.2        | 25.63            | 17.35        | 25.65             |
| 10-19                      | 40.48       | 27.37           | 45.16       | 28.62            | 44.9         | 28.59             |
| ≥20                        | 21.13       | 7.26            | 16.13       | 9                | 17.35        | 8.93              |
| Taking insulin, %          |             |                 |             |                  |              |                   |
| No                         | 52.38       | 82.73           | 51.61       | 79.43            | 51.02        | 79.52             |

1  
2  
3  
4  
5  
6  
7  
8  
9  
10  
11  
12  
13  
14  
15  
16  
17  
18  
19  
20  
21  
22  
23  
24  
25  
26  
27  
28  
29  
30  
31  
32  
33  
34  
35  
36  
37  
38  
39  
40  
41  
42  
43  
44  
45  
46

| Yes                                               | 47.62          | 17.27          | 48.39          | 20.57          | 48.98          | 20.48          |
|---------------------------------------------------|----------------|----------------|----------------|----------------|----------------|----------------|
| Examination and laboratory tests,<br>median (IQR) |                |                |                |                |                |                |
| Systolic blood pressure, mmHg                     | 136.00(26.00)  | 133.00(24.00)  | 133.00(28.00)  | 134.00(24.00)  | 132.50(27.50)  | 134.00(24.00)  |
| bmi                                               | 23.97(3.52)    | 24.40(4.06)    | 23.72(3.09)    | 24.38(3.99)    | 23.59(2.67)    | 24.39(4.02)    |
| whr                                               | 0.91(0.09)     | 0.90(0.07)     | 0.93(0.07)     | 0.90(0.08)     | 0.91(0.08)     | 0.90(0.08)     |
| whtr                                              | 0.53(0.07)     | 0.54(0.07)     | 0.52(0.06)     | 0.54(0.07)     | 0.52(0.06)     | 0.54(0.07)     |
| BAI                                               | 27.48(5.13)    | 28.86(5.12)    | 26.89(3.70)    | 28.74(5.28)    | 26.89(3.99)    | 28.74(5.27)    |
| Hba1c, %                                          | 7.80(2.20)     | 6.60(1.30)     | 8.00(2.40)     | 6.60(1.40)     | 8.00(2.50)     | 6.60(1.40)     |
| C-reaction protein                                | 1.35(2.03)     | 1.47(2.00)     | 1.19(1.68)     | 1.45(2.02)     | 1.17(1.69)     | 1.46(2.02)     |
| Total cholesterol                                 | 4.73(1.37)     | 4.78(1.40)     | 4.91(1.55)     | 4.77(1.38)     | 4.90(1.56)     | 4.77(1.38)     |
| Triglycerides                                     | 1.90(1.60)     | 1.91(1.58)     | 1.96(1.50)     | 1.90(1.58)     | 1.99(1.49)     | 1.90(1.58)     |
| Low-density cholesterol                           | 2.97(1.16)     | 3.00(1.28)     | 3.16(1.24)     | 2.98(1.25)     | 3.15(1.23)     | 2.98(1.25)     |
| High-density cholesterol                          | 1.22(0.47)     | 1.22(0.51)     | 1.21(0.50)     | 1.22(0.50)     | 1.21(0.50)     | 1.22(0.50)     |
| Creatinine                                        | 76.00(28.00)   | 69.00(25.00)   | 79.00(26.00)   | 70.00(25.00)   | 80.00(27.00)   | 70.00(25.00)   |
| Microalbuminuria                                  | 1.96(8.22)     | 0.85(2.29)     | 2.54(9.62)     | 0.91(2.48)     | 2.54(9.89)     | 0.91(2.48)     |
| Uric acid                                         | 374.00(123.00) | 368.00(128.00) | 357.00(144.00) | 369.00(128.00) | 355.50(132.00) | 369.00(128.00) |
| Axial length, mm                                  | 23.25(1.20)    | 23.44(1.19)    | 23.19(1.15)    | 23.43(1.20)    | 23.16(1.17)    | 23.43(1.20)    |

1  
2  
3  
4 153 than that in patients who were normal weight or obese (Figure 2, Table 2). However, there was  
5  
6 154 no significance in the association of BMI with any DR in the univariate binary or ordinal logistic  
7  
8  
9 155 model.

10  
11 156 After adjusted for gender and age, obesity presented as a protective factor for VTDR (odds  
12  
13  
14 157 ratio [or]=0.57, [95%CI, 0.33-0.96], p for trend = 0.028, Supplementary Table S1). The  
15  
16  
17 158 association remained after the regression model was additionally adjusted for lipid metabolism  
18  
19  
20 159 parameter (Supplementary Table S2).

21  
22 160 In the full model that further adjusted for continuous variables (age, systolic blood pressure,  
23  
24  
25 161 HbA1c, c-reaction protein, total cholesterol, triglycerides, low-density cholesterol, high-density  
26  
27  
28 162 cholesterol, creatinine, microalbuminuria, uric acid, and axial length) and categorical variables  
29  
30  
31 163 (sex, smoking history, drinking history, education, duration of diabetes, and insulin use), the  
32  
33  
34 164 association of BMI became significant with both DME and VTDR (for DME, p for trend =  
35  
36  
37 165 0.031; for VTDR, p for trend = 0.016, Table 3-1). Obesity was inversely associated with DME  
38  
39  
40 166 and VTDR with a decreased OR (for DME, or=0.40, [95%CI, 0.16-0.96]; for VTDR, or=0.37,  
41  
42  
43 167 [95%CI, 0.16-0.87], Table 3-1). However, the association was only significant in female  
44  
45  
46 168 patients (for DME, p for trend =0.021, or of obesity =0.10, [95%CI, 0.01-0.77]; for VTDR, p  
47  
48  
49 169 for trend =0.015, or of obesity =0.09, [95%CI, 0.01-0.76], Table 3-2), but not in male patients  
50  
51  
52 170 (Table 3-3).

### 171 **Association of WHR with any DR and severe DR**

53  
54 172 The prevalence of DR, DME and VTDR was the highest in the fourth quarter of WHR  
55  
56  
57 173 (Q4-WHR) (Figure 2, Table 2). In the univariable logistic regression model, Q4-WHR  
58  
59  
60 174 presented as a risk factor for DR (in the binary model, or=2.17, [95%CI, 1.13-4.17]; in the

**Table 2. The prevalence of DR, DME and VTDR in different groups of the obesity-related indexes.**

|                                 | No. of patients | DR prevalence, % | DME prevalence, % | VTDR prevalence, % |
|---------------------------------|-----------------|------------------|-------------------|--------------------|
| BMI, kg/m <sup>2</sup> (n=2245) |                 |                  |                   |                    |
| 18.5-22.9 (normal weight)       | 683             | 14.20            | 4.25              | 4.54               |
| 23.0-25.0 (over weight)         | 615             | 17.24            | 4.88              | 5.37               |
| ≥25.0 (obese)                   | 947             | 12.99            | 2.96              | 2.96               |
| WHR, (n=483)                    |                 |                  |                   |                    |
| Quarter 1                       | 124             | 13.71            | 2.42              | 3.23               |
| Quarter 2                       | 117             | 17.95            | 5.13              | 5.13               |
| Quarter 3                       | 121             | 11.57            | 1.65              | 2.48               |
| Quarter 4                       | 121             | 25.62            | 8.26              | 8.26               |
| WHtR, (n=1484)                  |                 |                  |                   |                    |
| Quarter 1                       | 371             | 16.17            | 5.12              | 5.39               |
| Quarter 2                       | 373             | 16.09            | 5.90              | 6.17               |
| Quarter 3                       | 369             | 14.09            | 4.07              | 4.07               |
| Quarter 4                       | 371             | 14.29            | 1.89              | 1.89               |
| BAI, (n=483)                    |                 |                  |                   |                    |
| Quarter 1                       | 121             | 26.45            | 7.44              | 8.26               |
| Quarter 2                       | 121             | 17.36            | 4.13              | 4.13               |
| Quarter 3                       | 121             | 12.40            | 4.13              | 4.13               |
| Quarter 4                       | 120             | 14.17            | 1.67              | 2.50               |

**Table 3-1 The OR of BMI, WHR, WHtR, and BAI in the binary logistic regression model additionally adjusted for other variables in all patients.**

Footnotes: These variables included continuous variables (e.g., age, systolic blood pressure, HbA1c, c-reaction protein, total cholesterol, triglycerides, low-density cholesterol, high-density cholesterol, creatinine, microalbuminuria, uric acid, and axial length) and categorical variables (e.g., sex, smoking history, drinking history, education, duration of diabetes, and insulin use). DR, DME and VTDR were set as outcomes of the regression model, respectively.

|                              | DR                 |         | DME                |         | VTDR               |         |
|------------------------------|--------------------|---------|--------------------|---------|--------------------|---------|
|                              | Odds ratio (95%CI) | P value | Odds ratio (95%CI) | P value | Odds ratio (95%CI) | P value |
| <b>BMI, kg/m<sup>2</sup></b> |                    |         |                    |         |                    |         |
| 18.5-22.9 (normal weight)    | Ref.               |         | Ref.               |         | Ref.               |         |
| 23.0-25.0 (overweight)       | 0.82(0.52, 1.29)   | 0.393   | 1.01(0.43, 2.37)   | 0.989   | 1.03(0.46, 2.32)   | 0.946   |
| ≥25.0 (obese)                | 0.72(0.47, 1.10)   | 0.131   | 0.40(0.16, 0.96)   | 0.041   | 0.37(0.16, 0.87)   | 0.023   |
| P for trend                  |                    | 0.134   |                    | 0.031   |                    | 0.016   |
| <b>WHR</b>                   |                    |         |                    |         |                    |         |
| Quarter 1                    | Ref.               |         | Ref.               |         | Ref.               |         |
| Quarter 2                    | 0.94(0.39, 2.29)   | 0.900   | 2.77(0.30, 25.73)  | 0.370   | 1.56(0.22, 10.86)  | 0.655   |
| Quarter 3                    | 0.49(0.19, 1.25)   | 0.136   | 0.79(0.09, 6.96)   | 0.830   | 0.62(0.11, 3.35)   | 0.579   |
| Quarter 4                    | 1.06(0.46, 2.45)   | 0.893   | 3.21(0.42, 24.78)  | 0.263   | 1.98(0.34, 11.61)  | 0.450   |
| P for trend                  |                    | 0.834   |                    | 0.459   |                    | 0.645   |
| <b>WHtR</b>                  |                    |         |                    |         |                    |         |
| Quarter 1                    | Ref.               |         | Ref.               |         | Ref.               |         |
| Quarter 2                    | 1.07(0.61, 1.87)   | 0.820   | 3.04(1.04, 8.85)   | 0.041   | 2.74(1.01, 7.43)   | 0.048   |
| Quarter 3                    | 0.64(0.35, 1.16)   | 0.142   | 1.13(0.31, 4.03)   | 0.856   | 0.93(0.28, 3.07)   | 0.906   |
| Quarter 4                    | 0.81(0.44, 1.48)   | 0.494   | 0.57(0.13, 2.59)   | 0.468   | 0.48(0.11, 2.09)   | 0.330   |
| P for trend                  |                    | 0.234   |                    | 0.252   |                    | 0.133   |
| <b>BAI</b>                   |                    |         |                    |         |                    |         |
| Quarter 1                    | Ref.               |         | Ref.               |         | Ref.               |         |
| Quarter 2                    | 0.77(0.35, 1.69)   | 0.512   | 1.15(0.29, 4.52)   | 0.845   | 1.05(0.29, 3.74)   | 0.943   |
| Quarter 3                    | 0.60(0.26, 1.37)   | 0.226   | 0.89(0.19, 4.13)   | 0.879   | 0.77(0.19, 3.08)   | 0.706   |
| Quarter 4                    | 0.57(0.23, 1.39)   | 0.216   | 0.63(0.11, 3.55)   | 0.605   | 0.92(0.22, 3.77)   | 0.909   |
| P for trend                  |                    | 0.191   |                    | 0.610   |                    | 0.769   |



**Table 3-2 The OR of BMI, WHR, WHtR, and BAI in the binary logistic regression model additionally adjusted for other variables in female patients.**

Footnotes: DR, DME and VTDR were set as outcomes of the regression model, respectively.

|                           | DR                 |         | DME                |         | VTDR               |         |
|---------------------------|--------------------|---------|--------------------|---------|--------------------|---------|
|                           | Odds ratio (95%CI) | P valve | Odds ratio (95%CI) | P valve | Odds ratio (95%CI) | P valve |
| <b>BMI, kg/m2</b>         |                    |         |                    |         |                    |         |
| 18.5-22.9 (normal weight) | Ref.               |         | Ref.               |         | Ref.               |         |
| 23.0-25.0 (overweight)    | 0.89(0.49, 1.62)   | 0.708   | 0.68(0.17, 2.68)   | 0.582   | 0.57(0.15, 2.17)   | 0.412   |
| ≥25.0 (obese)             | 0.77(0.43, 1.39)   | 0.392   | 0.10(0.01, 0.77)   | 0.027   | 0.09(0.01, 0.76)   | 0.027   |
| P for trend               |                    | 0.392   |                    | 0.021   |                    | 0.015   |
| <b>WHR</b>                |                    |         |                    |         |                    |         |
| Quarter 1                 | Ref.               |         | Ref.               |         | Ref.               |         |
| Quarter 2                 | 1.31(0.46, 3.75)   | 0.610   | 1.42(0.02, 81.66)  | 0.866   | 0.78(0.02, 29.41)  | 0.894   |
| Quarter 3                 | 0.25(0.04, 1.34)   | 0.106   | *                  | *       | *                  | *       |
| Quarter 4                 | 1.20(0.40, 3.55)   | 0.748   | 3.52(0.20, 61.43)  | 0.389   | 2.21(0.26, 18.92)  | 0.470   |
| P for trend               |                    | 0.617   |                    | 0.459   |                    | 0.786   |
| <b>WHtR</b>               |                    |         |                    |         |                    |         |
| Quarter 1                 | Ref.               |         | Ref.               |         | Ref.               |         |
| Quarter 2                 | 1.36(0.60, 3.09)   | 0.466   | 6.79(1.19, 38.57)  | 0.031   | 7.38(1.48, 36.77)  | 0.015   |
| Quarter 3                 | 0.70(0.30, 1.67)   | 0.421   | *                  | *       | *                  | *       |
| Quarter 4                 | 1.10(0.47, 2.56)   | 0.828   | 0.41(0.06, 2.63)   | 0.347   | 0.40(0.06, 2.73)   | 0.351   |
| P for trend               |                    | 0.884   |                    | 0.065   |                    | 0.049   |
| <b>BAI</b>                |                    |         |                    |         |                    |         |
| Quarter 1                 | Ref.               |         | Ref.               |         | Ref.               |         |
| Quarter 2                 | 1.11(0.26, 4.78)   | 0.889   | 0.31(0.01, 12.27)  | 0.534   | 0.30(0.01, 8.98)   | 0.487   |
| Quarter 3                 | 0.66(0.15, 2.93)   | 0.582   | 0.83(0.04, 15.46)  | 0.898   | 0.80(0.11, 5.86)   | 0.822   |
| Quarter 4                 | 0.73(0.17, 3.11)   | 0.673   | 0.26(0.01, 6.94)   | 0.425   | 0.76(0.14, 4.26)   | 0.758   |
| P for trend               |                    | 0.512   |                    | 0.653   |                    | 0.857   |

\* No observation.

**Table 3-3 The OR of BMI, WHR, WHtR, and BAI in the binary logistic regression model additionally adjusted for other variables in male patients.**

Footnotes: DR, DME and VTDR were set as outcomes of the regression model, respectively.

|                              | DR                 |         | DME                |         | VTDR               |         |
|------------------------------|--------------------|---------|--------------------|---------|--------------------|---------|
|                              | Odds ratio (95%CI) | P valve | Odds ratio (95%CI) | P valve | Odds ratio (95%CI) | P valve |
| <b>BMI, kg/m<sup>2</sup></b> |                    |         |                    |         |                    |         |
| 18.5-22.9 (normal weight)    | Ref.               |         | Ref.               |         | Ref.               |         |
| 23.0-25.0 (overweight)       | 0.61(0.29, 1.27)   | 0.182   | 1.63(0.46, 5.74)   | 0.448   | 1.84(0.54, 6.22)   | 0.328   |
| ≥25.0 (obese)                | 0.59(0.29, 1.19)   | 0.144   | 0.73(0.23, 2.38)   | 0.605   | 0.71(0.22, 2.27)   | 0.565   |
| P for trend                  |                    | 0.183   |                    | 0.411   |                    | 0.326   |
| <b>WHR</b>                   |                    |         |                    |         |                    |         |
| Quarter 1                    | Ref.               |         | *                  | *       | *                  | *       |
| Quarter 2                    | 0.64(0.12, 3.39)   | 0.602   | Ref.               |         | Ref.               |         |
| Quarter 3                    | 0.61(0.14, 2.73)   | 0.514   | 0.40(0.06, 2.78)   | 0.354   | 0.53(0.09, 3.02)   | 0.472   |
| Quarter 4                    | 1.07(0.27, 4.29)   | 0.919   | 1.35(0.18, 9.92)   | 0.771   | 1.55(0.21, 11.45)  | 0.669   |
| P for trend                  |                    | 0.777   |                    | 0.190   |                    | 0.136   |
| <b>WHtR</b>                  |                    |         |                    |         |                    |         |
| Quarter 1                    | Ref.               |         | Ref.               |         | Ref.               |         |
| Quarter 2                    | 0.75(0.33, 1.70)   | 0.494   | 1.85(0.53, 6.52)   | 0.337   | 1.43(0.44, 4.66)   | 0.557   |
| Quarter 3                    | 0.48(0.19, 1.18)   | 0.109   | 1.39(0.35, 5.56)   | 0.643   | 1.06(0.29, 3.88)   | 0.927   |
| Quarter 4                    | 0.56(0.21, 1.50)   | 0.248   | 0.68(0.09, 5.40)   | 0.718   | 0.57(0.07, 4.64)   | 0.601   |
| P for trend                  |                    | 0.124   |                    | 0.714   |                    | 0.567   |
| <b>BAI</b>                   |                    |         |                    |         |                    |         |
| Quarter 1                    | Ref.               |         | Ref.               |         | Ref.               |         |
| Quarter 2                    | 0.57(0.19, 1.75)   | 0.327   | 1.61(0.36, 7.12)   | 0.530   | 1.55(0.38, 6.33)   | 0.544   |
| Quarter 3                    | 0.60(0.22, 1.67)   | 0.330   | 0.41(0.04, 3.90)   | 0.438   | 0.35(0.04, 3.04)   | 0.339   |
| Quarter 4                    | 0.46(0.08, 2.80)   | 0.403   | *                  | *       | *                  | *       |
| P for trend                  |                    | 0.243   |                    | 0.464   |                    | 0.399   |

\* No observation.

**Table 4. The odds ratio (OR) of BMI, WHR, WHtR, and BAI in the univariate logistic regression model.** Footnotes: DR, DME and VTDR were set as outcomes of the regression model, respectively.

|                           | Binary regression model of DR |         | Ordinal regression model of DR |         | Binary regression model of DME |         | Binary regression model of VTDR |         |
|---------------------------|-------------------------------|---------|--------------------------------|---------|--------------------------------|---------|---------------------------------|---------|
|                           | OR (95%CI)                    | P valve | OR (95%CI)                     | P valve | OR (95%CI)                     | P valve | Odds ratio (95%CI)              | P valve |
| <b>BMI, kg/m2</b>         |                               |         |                                |         |                                |         |                                 |         |
| 18.5-22.9 (normal weight) | Ref.                          |         | Ref.                           |         | Ref.                           |         | Ref.                            |         |
| 23.0-25.0 (overweight)    | 1.26(0.93, 1.70)              | 0.133   | 1.28(0.95, 1.72)               | 0.109   | 1.16(0.69, 1.95)               | 0.585   | 1.19(0.72, 1.97)                | 0.492   |
| ≥25.0 (obese)             | 0.90(0.68, 1.20)              | 0.479   | 0.89(0.67, 1.18)               | 0.425   | 0.69(0.40, 1.17)               | 0.164   | 0.64(0.38, 1.08)                | 0.094   |
| P for trend               |                               | 0.381   |                                | 0.329   |                                | 0.147   |                                 | 0.083   |
| <b>WHR</b>                |                               |         |                                |         |                                |         |                                 |         |
| Quarter 1                 | Ref.                          |         | Ref.                           |         | Ref.                           |         | Ref.                            |         |
| Quarter 2                 | 1.38(0.69, 2.76)              | 0.368   | 1.39(0.69, 2.77)               | 0.355   | 2.18(0.53, 8.93)               | 0.279   | 1.62(0.45, 5.90)                | 0.463   |
| Quarter 3                 | 0.82(0.39, 1.75)              | 0.615   | 0.85(0.40, 1.80)               | 0.669   | 0.68(0.11, 4.13)               | 0.673   | 0.76(0.17, 3.48)                | 0.727   |
| Quarter 4                 | 2.17(1.13, 4.17)              | 0.021   | 2.25(1.18, 4.32)               | 0.014   | 3.63(0.97, 13.54)              | 0.055   | 2.70(0.82, 8.87)                | 0.101   |
| P for trend               |                               | 0.056   |                                | 0.040   |                                | 0.093   |                                 | 0.152   |
| <b>WHtR</b>               |                               |         |                                |         |                                |         |                                 |         |
| Quarter 1                 | Ref.                          |         | Ref.                           |         | Ref.                           |         | Ref.                            |         |
| Quarter 2                 | 0.99(0.67, 1.47)              | 0.974   | 0.99(0.67, 1.46)               | 0.962   | 1.16(0.62, 2.18)               | 0.643   | 1.15(0.62, 2.14)                | 0.651   |
| Quarter 3                 | 0.85(0.57, 1.27)              | 0.430   | 0.86(0.57, 1.28)               | 0.457   | 0.79(0.39, 1.57)               | 0.494   | 0.74(0.37, 1.48)                | 0.397   |
| Quarter 4                 | 0.86(0.58, 1.29)              | 0.475   | 0.86(0.57, 1.28)               | 0.444   | 0.36(0.15, 0.86)               | 0.021   | 0.34(0.14, 0.81)                | 0.015   |
| P for trend               |                               | 0.358   |                                | 0.344   |                                | 0.015   |                                 | 0.009   |
| <b>BAI</b>                |                               |         |                                |         |                                |         |                                 |         |
| Quarter 1                 | Ref.                          |         | Ref.                           |         | Ref.                           |         | Ref.                            |         |
| Quarter 2                 | 0.64(0.34, 1.19)              | 0.158   | 0.61(0.33, 1.13)               | 0.117   | 0.54(0.17, 1.65)               | 0.277   | 0.48(0.16, 1.44)                | 0.191   |
| Quarter 3                 | 0.43(0.22, 0.85)              | 0.015   | 0.43(0.22, 0.84)               | 0.014   | 0.54(0.17, 1.65)               | 0.277   | 0.48(0.16, 1.44)                | 0.191   |
| Quarter 4                 | 0.50(0.26, 0.97)              | 0.039   | 0.49(0.25, 0.94)               | 0.031   | 0.21(0.04, 1.00)               | 0.05    | 0.28(0.08, 1.06)                | 0.061   |
| P for trend               |                               | 0.017   |                                | 0.015   |                                | 0.042   |                                 | 0.051   |

1  
2  
3  
4 175 ordinal model,  $or=2.25$ , [95%CI, 1.18-4.32], Table 4). When DME and VTDR were set as the  
5  
6  
7 176 outcome of the model, WHR presented a similar trend, although it was not significant.

8  
9 177 After the logistic regression model was adjusted for sex and age, Q4-WHR remained a risk  
10  
11  
12 178 factor for DR ( $or=2.02$ , [95% CI, 1.03-3.98], Supplementary Table S1). The association  
13  
14  
15 179 remained independent of the lipid metabolism parameter (Supplementary Table S2). However,  
16  
17 180 in the full model, the association of WHR with DR and severe DR presented a similar trend,  
18  
19  
20 181 but was not significant (Table 3-1).

### 21 22 182 **Association of WHtR with any DR and severe DR**

23  
24  
25 183 The prevalence of DR decreased slightly with the growth of WHtR, while the prevalence  
26  
27  
28 184 of DME and VTDR was the highest in the Q2-WHtR, and then decreased (Table 2). In the  
29  
30  
31 185 univariate regression model, Q4-WHtR presented as a significant protective factor for DME  
32  
33 186 ( $or=0.36$ , [95%CI, 0.15-0.86], Table 4) and VTDR, ( $or=0.34$ , [95%CI, 0.14-0.81]).

34  
35 187 In the logistic regression model adjusted for sex and age, Q4-WHtR remained as a  
36  
37  
38 188 protective factor of VTDR ( $or=0.40$ , [95% CI, 0.16-0.96], Supplementary Table S1),  
39  
40  
41 189 independent of lipid metabolism parameter (Supplementary Table S2). In the full model, Q2-  
42  
43  
44 190 WHtR presented as a significant risk factor of DME ( $or=3.04$ , [95 %CI, 1.04-8.85], Table 3-1)  
45  
46  
47 191 and VTDR ( $or=2.74$ , [95%CI, 1.01-7.43]). The association was also more significant in female  
48  
49  
50 192 patients (for DME,  $p$  for trend =0.065, or of Q2-WHtR =6.79, [95%CI, 1.19-38.57]; for VTDR,  
51  
52  
53 193  $p$  for trend =0.049, or of Q2-WHtR =7.38, [95%CI, 1.48-36.77], Table 3-2), but not in male  
54  
55  
56 194 patients either (Table 3-2).

### 57 58 195 **Association of BAI with any DR and severe DR**

59 196 The prevalence of DR and severe VTDR showed a downward trend with the increase of  
60

1  
2  
3  
4 197 BAI (Figure 2, Table 2). However, in the univariate logistic regression model, increased BAI  
5  
6 198 was associated with a decreased risk of DR (Table 4). After adjusted for sex and age, the  
7  
8  
9 199 association became less significant, while in the full model, the association with either any DR,  
10  
11  
12 200 DME or VTDR was not significant.

13  
14 201

## 17 202 **Discussion**

19 203 In this study, we enrolled 2,305 participants and analyzed the association of obesity with  
20  
21  
22 204 any DR, DME and VTDR. There are three main findings in our study. First, only 29.6% of  
23  
24  
25 205 diabetic patients had normal weight, while as high as 67.8% of diabetic patients were  
26  
27 206 overweight or obese. Second, obesity (BMI>25.0kg/m<sup>2</sup>) presented as a significant protective  
28  
29  
30 207 factor of VTDR, while Q2-WHtR presented as a significant risk factor. However, both of the  
31  
32  
33 208 associations were only significant in female patients, but not in male patients. Third, as the first  
34  
35 209 study analyzing the association between BAI and DR, we found a significant negative  
36  
37  
38 210 association in the univariate logistic regression model, while the association became less  
39  
40  
41 211 significant in the multivariable model.

42  
43 212 Previous studies recognized obesity as a critical component of metabolic syndrome, which  
44  
45 213 induces insulin resistance and advances the development of type 2 diabetes<sup>2,3</sup>. Therefore, weight  
46  
47  
48 214 control is usually recommended in the management of diabetes and several systemic diseases  
49  
50  
51 215 to reduce the prevalence of complications<sup>3,12,13</sup>. However, in this study, three obesity-related  
52  
53 216 indexes, BMI, WHtR, and BAI, were all negatively associated with DR. The result presented  
54  
55  
56 217 as an "obesity paradox", which was also presented in several previous studies<sup>14-16</sup>. Moreover, it  
57  
58  
59 218 was more significant in the association with VTDR. The first possible reason would be that  
60

1  
2  
3  
4 219 VTDR, presented and DME or PDR, was more likely to appear in the patients with advanced  
5  
6 220 diabetes. Advanced diabetes would manifest as weight loss as one of the metabolic  
7  
8  
9 221 complications, contributing to the inverse association of obesity with DR. Second, BMI could  
10  
11 222 hardly differentiate general obesity and centripetal obesity, which may play a different role in  
12  
13  
14 223 the progress of diabetes. Third, all the participants were from the community. They were  
15  
16  
17 224 diagnosed with diabetes in the hospital before the enrollment. The patients who had severe  
18  
19 225 complications, low willingness to seek doctor's help or mobility problems, would be limited,  
20  
21  
22 226 contributing to the selection bias in the study.

23  
24  
25 227 Although obesity was recognized as one of the important biomarkers inducing insulin  
26  
27 228 resistance<sup>17</sup>, the obesity paradox has prevented scientists from making recommendations on  
28  
29  
30 229 weight management for diabetic patients. Several studies have revealed a positive association  
31  
32 230 between centripetal obesity and chronic inflammation<sup>18,19</sup>, which may contribute to the positive  
33  
34  
35 231 correlation between centripetal obesity (presented as higher WHR) and diabetic progression<sup>20</sup>.  
36  
37  
38 232 However, in our study, as the indicator of centripetal obesity, Q2-WHtR associated positively  
39  
40 233 with DR, and WHtR generally shows an opposite trend, indicating a nonlinear relationship  
41  
42  
43 234 between centripetal obesity. It also demonstrated WHtR as a more critical factor of DR as well  
44  
45 235 as the traditional index BMI.

46  
47  
48 236 Our study also found that the associations between obesity-related index (both BMI and  
49  
50 237 WHR) and VTDR were only significant in female patients, indicating that female patients  
51  
52  
53 238 would have a higher risk with the increase of centripetal obesity. The sex-specific obesity-  
54  
55  
56 239 diabetes association has been reported in several studies, but the association between obesity-  
57  
58 240 related indexes (including BMI, WHR, WHtR, BAI) and diabetic retinopathy was seldom  
59  
60

1  
2  
3  
4 241 reported. We furthered analyzed the sex-specific distribution regarding different obesity-related  
5  
6 242 indexes (Figure 3). Male patients have a significantly higher WHR, lower WHtR and lower  
7  
8  
9 243 BAI. Therefore, weight control management and standard weight range should be made  
10  
11  
12 244 regarding different sex in diabetic patients.

13  
14 245 There are some other limitations in this study. First, the measurement of waist  
15  
16 246 circumference and hip circumference was not performed on every participant. Therefore, we  
17  
18  
19 247 are unable to put BMI, WHR, WHtR, and BAI in the full model at the same time. In the sex-  
20  
21  
22 248 specific regression model, there was no positive observation in several groups (Q3-WHR and  
23  
24 249 Q3-WHtR in female patients, Q-1-WHR and Q4-BAI in male patients). Second, although we  
25  
26  
27 250 used robust regression to make the odds ratio more robust, we did not exclude the influence of  
28  
29  
30 251 collinearity in the full model, which may contribute to the variation of the association of factors  
31  
32  
33 252 such as BAI with DR. Third, the participants with diabetes in our study were free from cognitive  
34  
35 253 impairments and were referred to Zhongshan Ophthalmic Center from the community health  
36  
37  
38 254 centers. These patients usually had a less severe condition than the patients who were less  
39  
40 255 willing to undertake routine examination in the community health centers because of mobility  
41  
42  
43 256 problems or less attention on their health problems, affecting the generalizability of the results.

44  
45 257 In summary, this study provides medical data of 2,305 participants, and analyzed the  
46  
47  
48 258 relationship between obesity and DR. The results presented general obesity and centripetal  
49  
50  
51 259 obesity as a protective factor in the development of DR, which was more significant in female  
52  
53  
54 260 patients. Because the interactions between obesity and DR is not completely clear, further  
55  
56  
57 261 researches are needed to focus on the improvement of sex-specific weight management in  
58  
59 262 diabetic patients regarding different sex.

1  
2  
3  
4 263 **Contributors**

5  
6 264 W Huang and W Wei conceived and designed the study. W Li, W Wei, X Gong, L Wang,  
7  
8  
9 265 J Meng, Y Li, and K Xiong collected and interpreted the data. W Li and W Wei carried out the  
10  
11 266 statistical analysis. W Li wrote the manuscript. W Huang, W Wang, and X Gong reviewed and  
12  
13  
14 267 edited the manuscript. All authors have seen the final version of the manuscript and approved  
15  
16  
17 268 it for publication.  
18  
19

20 269

21  
22 270 **Role of the Funding Source**

23  
24  
25 271 This study was supported by the Guangdong Province Science & Technology Plan  
26  
27 272 (2014B020228002), National Natural Science Foundation of China (82000901, 81900866),  
28  
29  
30 273 Fundamental Research Funds of the State Key Laboratory of Ophthalmology  
31  
32 274 (303060202400362). The funding organizations had no role in the design or conduct of the  
33  
34  
35 275 study; collection, management, analysis and interpretation of the data; preparation, review or  
36  
37  
38 276 approval of the manuscript; and decision to submit the manuscript for publication.  
39

40 277

41  
42  
43 278 **Declaration of Interests**

44  
45 279 The authors declare no competing financial interests.  
46  
47

48 280

49  
50 281  
51  
52  
53  
54  
55  
56  
57  
58  
59  
60



## References:

- 1 Ting, D. S. W., Cheung, G. C. M. & Wong, T. Y., Diabetic retinopathy: global prevalence, major risk factors, screening practices and public health challenges: a review. *Clinical & Experimental Ophthalmology* **44** 260 (2016).
- 2 Malone, J. I. & Hansen, B. C., Does obesity cause type 2 diabetes mellitus (T2DM)? Or is it the opposite? *PEDIATR DIABETES* **20** 5 (2019).
- 3 Hitman, G. A. & Finer, S., Obesity and Type 2 diabetes; achieving weight loss. *DIABETIC MED* **28** 627 (2011).
- 4 Hao, Z. *et al.*, Analysis of factors related to diabetic retinopathy in patients with newly diagnosed type 2 diabetes: a cross-sectional study. *BMJ OPEN* **10** e32095 (2020).
- 5 Zhu, W. *et al.*, Association of obesity and risk of diabetic retinopathy in diabetes patients. *MEDICINE* **97** e11807 (2018).
- 6 Madsen, L. R., Bek, T. & Richelsen, B., Diabetic retinopathy in people with Type 2 diabetes and obesity treated by Roux - en - Y gastric bypass compared with non - operated controls: with focus on the role of diabetes remission in a cross - sectional and a 6 - year follow - up study. *DIABETIC MED* (2018).
- 7 Raum, P. *et al.*, Prevalence and Cardiovascular Associations of Diabetic Retinopathy and Maculopathy: Results from the Gutenberg Health Study. *PLOS ONE* **10** e127188 (2015).
- 8 Bergman, R. N. *et al.*, A Better Index of Body Adiposity. *OBESITY* **19** 1083 (2011).
- 9 Hills, A. P. *et al.*, Epidemiology and determinants of type 2 diabetes in south Asia. *The Lancet Diabetes & Endocrinology* **6** 966 (2018).
- 10 Forthun, I. *et al.*, Maternal Prepregnancy BMI and Risk of Cerebral Palsy in Offspring. *PEDIATRICS* **138** e20160874 (2016).
- 11 Morisaki, N. *et al.*, Pre-pregnancy BMI-specific optimal gestational weight gain for women in Japan. *J EPIDEMIOLOG* **27** 492 (2017).
- 12 IOTF, W. I., Asia-Pacific perspective: Redefining obesity and its treatment. (2000).
- 13 ESC Guidelines on diabetes, pre-diabetes, and cardiovascular diseases developed in collaboration with the EASD. *EUR HEART J* **34** 3035 (2013).
- 14 Smith, J. J., Wright, D. M., Scanlon, P. & Lois, N., Risk factors associated with progression to referable retinopathy: a type 2 diabetes mellitus cohort study in the Republic of Ireland. *DIABETIC MED* (2020).
- 15 Li, Y. H., Sheu, W. H. & Lee, I. T., Influence of Diabetic Retinopathy on the Relationship Between Body Mass Index and Mortality in Patients with Poorly Controlled Type 2 Diabetes. *Diabetes Metab Syndr Obes* **13** 907 (2020).
- 16 Al Rubeaan, K. *et al.*, Diabetic retinopathy and its risk factors in a society with a type 2 diabetes epidemic: a Saudi National Diabetes Registry - based study. *ACTA OPHTHALMOL* **93** e140 (2015).
- 17 Arkan, M. C. *et al.*, IKK-beta links inflammation to obesity-induced insulin resistance. *NAT MED* **11** 191 (2005).
- 18 Panagiotakos, D. B., Pitsavos, C., Yannakoulia, M., Chrysohoou, C. & Stefanadis, C., The implication of obesity and central fat on markers of chronic inflammation: The ATTICA study. *ATHEROSCLEROSIS* **183** 308 (2005).
- 19 Anan, F. *et al.*, Diabetic retinopathy is associated with insulin resistance and cardiovascular

1  
2  
3 autonomic dysfunction in type 2 diabetic patients. *HYPERTENS RES* **32** 299 (2009).

4 <sup>20</sup> Man, R. E. K. *et al.*, Differential Association of Generalized and Abdominal Obesity With Diabetic  
5 Retinopathy in Asian Patients With Type 2 Diabetes. *JAMA OPHTHALMOL* **134** 251 (2016).  
6  
7  
8  
9  
10  
11  
12  
13  
14  
15  
16  
17  
18  
19  
20  
21  
22  
23  
24  
25  
26  
27  
28  
29  
30  
31  
32  
33  
34  
35  
36  
37  
38  
39  
40  
41  
42  
43  
44  
45  
46  
47  
48  
49  
50  
51  
52  
53  
54  
55  
56  
57  
58  
59  
60

For peer review only

1  
2  
3 **Figure Legend**  
4  
5  
6

7 **Figure 1. International Clinical Severity Scale of Diabetic Retinopathy and Diabetic**  
8 **Macular Edema.** Footnotes: DR: diabetic retinopathy; NPDR: non-proliferative diabetic  
9 retinopathy; PDR: proliferative diabetic retinopathy; IRMA: intraretinal microvascular  
10 abnormalities; DME: diabetic macular edema.  
11  
12  
13  
14

15  
16 **Figure 2. The prevalence of diabetic retinopathy (DR) and severe DR (diabetic**  
17 **retinopathy, DME, and vision threatening diabetic retinopathy, VTDR) in different**  
18 **groups of the obesity-related indexes.** Footnotes: BMI: Body mass index. WHR: Waist to  
19 hip ratio. WHtR: waist to height ratio. BAI: Body adiposity index.  
20  
21  
22  
23  
24

25  
26 **Figure 3. The number of male and female patients in different groups of the obesity-**  
27 **related indexes**  
28  
29  
30  
31  
32  
33  
34  
35  
36  
37  
38  
39  
40  
41  
42  
43  
44  
45  
46  
47  
48  
49  
50  
51  
52  
53  
54  
55  
56  
57  
58  
59  
60

| Severity level       | Findings after pupil dilation                                                                                                                                                                                                                                                                                                                                                                                                                           | Any DR | DME | VTDR |
|----------------------|---------------------------------------------------------------------------------------------------------------------------------------------------------------------------------------------------------------------------------------------------------------------------------------------------------------------------------------------------------------------------------------------------------------------------------------------------------|--------|-----|------|
| <b>DR scale</b>      |                                                                                                                                                                                                                                                                                                                                                                                                                                                         |        |     |      |
| <b>No DR</b>         | No abnormalities                                                                                                                                                                                                                                                                                                                                                                                                                                        |        |     |      |
| <b>Mild NPDR</b>     | Microaneurysms only                                                                                                                                                                                                                                                                                                                                                                                                                                     |        |     |      |
| <b>Moderate NPDR</b> | More than just microaneurysms but less than Severe NPDR                                                                                                                                                                                                                                                                                                                                                                                                 |        |     |      |
| <b>Severe NPDR</b>   | Any of the following:<br><ul style="list-style-type: none"> <li>• &gt;20 intraretinal hemorrhages in each of 4 quadrants;</li> <li>• Definite venous beading in 2+ quadrants;</li> <li>• Prominent IRMA in 1+ quadrant</li> </ul> And no signs of proliferative retinopathy                                                                                                                                                                             |        |     |      |
| <b>PDR</b>           | One or more of the following:<br><ul style="list-style-type: none"> <li>• Neovascularization;</li> <li>• Vitreous/preretinal hemorrhage</li> </ul>                                                                                                                                                                                                                                                                                                      |        |     |      |
| <b>DME scale</b>     |                                                                                                                                                                                                                                                                                                                                                                                                                                                         |        |     |      |
| <b>No DME</b>        | No apparent retinal thickening or hard exudates in posterior pole                                                                                                                                                                                                                                                                                                                                                                                       |        |     |      |
| <b>DME</b>           | Some retinal thickening or hard exudates in posterior pole:<br><ul style="list-style-type: none"> <li>• Mild: some retinal thickening or hard exudates in posterior pole but distant from the center of the macular;</li> <li>• Moderate: retinal thickening or hard exudates approaching the center of the macula but not involving the center;</li> <li>• Severe: Retinal thickening or hard exudates involving the center of the macular.</li> </ul> |        |     |      |

**Figure 1. International Clinical Severity Scale of Diabetic Retinopathy and Diabetic Macular Edema.** Footnotes: DR: diabetic retinopathy; NPDR: non-proliferative diabetic retinopathy; PDR: proliferative diabetic retinopathy; IRMA: intraretinal microvascular abnormalities; DME: diabetic macular edema.

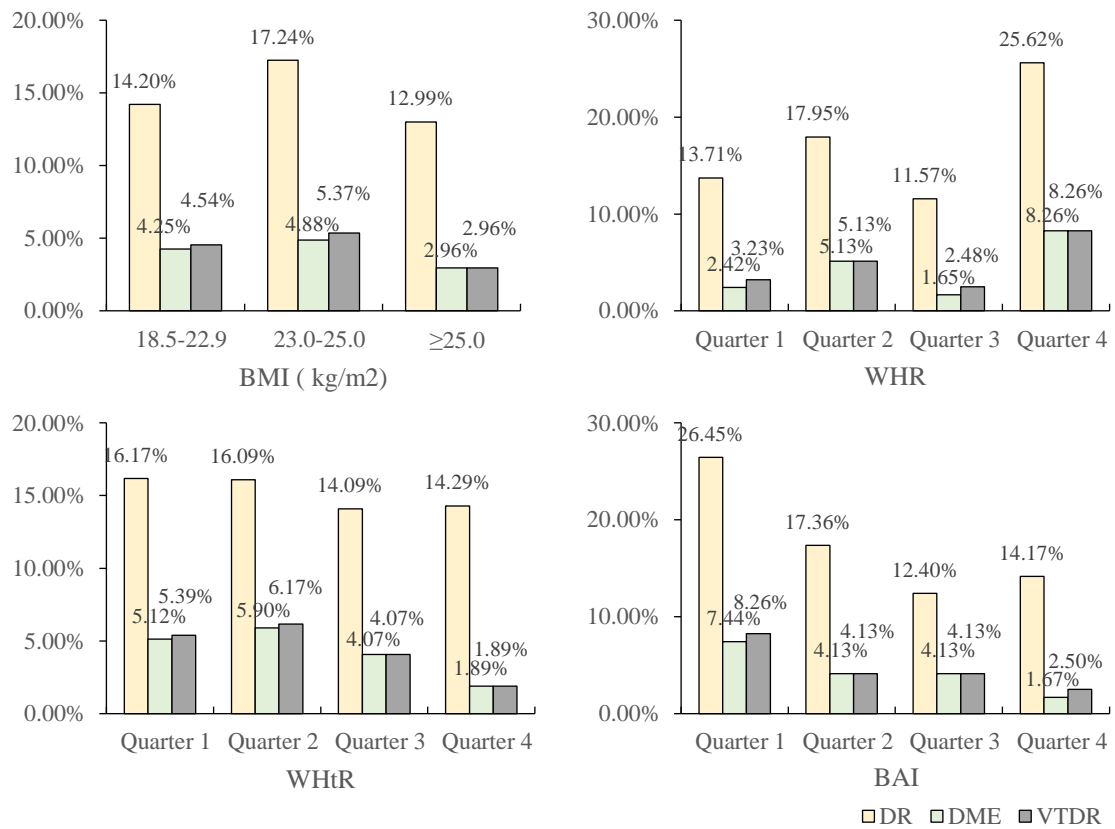

**Figure 2. The prevalence of diabetic retinopathy (DR) and severe DR (diabetic retinopathy, DME, and vision threatening diabetic retinopathy, VTDR) in different groups of the obesity-related indexes.** Footnotes: BMI: Body mass index. WHR: Waist to hip ratio. WHtR: waist to height ratio. BAI: Body adiposity index.

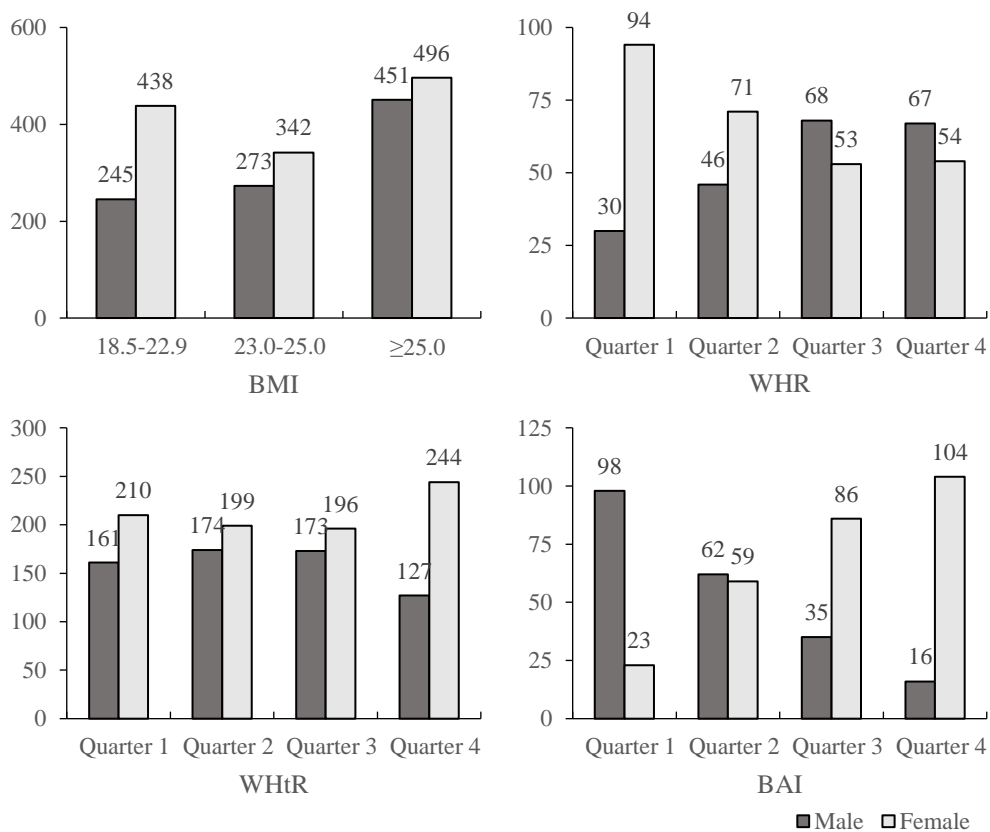

**Figure 3. The number of male and female patients in different groups of the obesity-related indexes.**

## Supplementary Materials

**Table S1 The odds ratio (OR) of Body mass index (BMI), Waist to hip ratio (WHR), waist to height ratio (WHtR), and Body adiposity index (BAI) in the binary logistic regression model adjusted for age and sex.** Footnotes: diabetic retinopathy (DR), diabetic macular edema (DME) and vision threatening diabetic retinopathy (VTDR) were set as outcomes of the regression model, respectively.

|                              | DR                 |         | DME                |         | VTDR               |         |
|------------------------------|--------------------|---------|--------------------|---------|--------------------|---------|
|                              | Odds ratio (95%CI) | P valve | Odds ratio (95%CI) | P valve | Odds ratio (95%CI) | P valve |
| <b>BMI, kg/m<sup>2</sup></b> |                    |         |                    |         |                    |         |
| 18.5-22.9 (normal weight)    | Ref.               |         | Ref.               |         | Ref.               |         |
| 23.0-25.0 (overweight)       | 1.22(0.90, 1.65)   | 0.200   | 1.09(0.64, 1.84)   | 0.758   | 1.12(0.67, 1.86)   | 0.660   |
| ≥25.0 (obese)                | 0.85(0.64, 1.14)   | 0.275   | 0.61(0.35, 1.04)   | 0.067   | 0.57(0.33, 0.96)   | 0.034   |
| P for trend                  |                    | 0.204   |                    | 0.056   |                    | 0.028   |
| <b>WHR</b>                   |                    |         |                    |         |                    |         |
| Quarter 1                    | Ref.               |         | Ref.               |         | Ref.               |         |
| Quarter 2                    | 1.32(0.66, 2.67)   | 0.434   | 2.18(0.52, 9.10)   | 0.283   | 1.60(0.43, 5.93)   | 0.478   |
| Quarter 3                    | 0.77(0.35, 1.67)   | 0.503   | 0.68(0.11, 4.30)   | 0.682   | 0.76(0.16, 3.59)   | 0.725   |
| Quarter 4                    | 2.02(1.03, 3.98)   | 0.041   | 3.61(0.92, 14.16)  | 0.065   | 2.65(0.77, 9.12)   | 0.123   |
| P for trend                  |                    | 0.089   |                    | 0.101   |                    | 0.169   |
| <b>WHtR</b>                  |                    |         |                    |         |                    |         |
| Quarter 1                    | Ref.               |         | Ref.               |         | Ref.               |         |
| Quarter 2                    | 1.00(0.68, 1.48)   | 0.991   | 1.21(0.64, 2.28)   | 0.558   | 1.20(0.64, 2.23)   | 0.567   |
| Quarter 3                    | 0.87(0.58, 1.30)   | 0.495   | 0.84(0.42, 1.68)   | 0.620   | 0.79(0.40, 1.58)   | 0.509   |
| Quarter 4                    | 0.95(0.63, 1.42)   | 0.785   | 0.42(0.17, 1.02)   | 0.055   | 0.40(0.16, 0.96)   | 0.039   |
| P for trend                  |                    | 0.627   |                    | 0.046   |                    | 0.029   |
| <b>BAI</b>                   |                    |         |                    |         |                    |         |
| Quarter 1                    | Ref.               |         | Ref.               |         | Ref.               |         |
| Quarter 2                    | 0.64(0.34, 1.23)   | 0.182   | 0.57(0.18, 1.84)   | 0.344   | 0.51(0.16, 1.60)   | 0.247   |
| Quarter 3                    | 0.44(0.21, 0.93)   | 0.031   | 0.62(0.18, 2.18)   | 0.456   | 0.55(0.16, 1.90)   | 0.348   |
| Quarter 4                    | 0.52(0.24, 1.13)   | 0.098   | 0.27(0.05, 1.56)   | 0.144   | 0.37(0.08, 1.69)   | 0.199   |
| P for trend                  |                    | 0.060   |                    | 0.166   |                    | 0.201   |

**Table S2 The OR of BMI, WHR, WHtR, and BAI in the binary logistic regression model adjusted for age, sex, and lipid metabolism parameter (total cholesterol, triglycerides, low-density cholesterol, and high-density cholesterol).** Footnotes: DR, DME and VTDR were set as outcomes of the regression model, respectively.

|                              | DR                 |         | DME                |         | VTDR               |         |
|------------------------------|--------------------|---------|--------------------|---------|--------------------|---------|
|                              | Odds ratio (95%CI) | P value | Odds ratio (95%CI) | P value | Odds ratio (95%CI) | P value |
| <b>BMI, kg/m<sup>2</sup></b> |                    |         |                    |         |                    |         |
| 18.5-22.9 (normal weight)    | Ref.               |         | Ref.               |         | Ref.               |         |
| 23.0-25.0 (overweight)       | 1.24(0.91, 1.68)   | 0.175   | 1.10(0.64, 1.88)   | 0.729   | 1.13(0.67, 1.89)   | 0.649   |
| ≥25.0 (obese)                | 0.87(0.64, 1.17)   | 0.343   | 0.61(0.35, 1.06)   | 0.079   | 0.56(0.33, 0.97)   | 0.039   |
| P for trend                  |                    | 0.251   |                    | 0.065   |                    | 0.030   |
| <b>WHR</b>                   |                    |         |                    |         |                    |         |
| Quarter 1                    | Ref.               |         | Ref.               |         | Ref.               |         |
| Quarter 2                    | 1.37(0.67, 2.78)   | 0.387   | 2.38(0.56, 10.10)  | 0.241   | 1.68(0.45, 6.35)   | 0.441   |
| Quarter 3                    | 0.81(0.36, 1.80)   | 0.604   | 0.78(0.12, 5.15)   | 0.795   | 0.79(0.16, 3.95)   | 0.776   |
| Quarter 4                    | 2.22(1.08, 4.55)   | 0.030   | 4.37(1.02, 18.80)  | 0.048   | 2.85(0.76, 10.69)  | 0.121   |
| P for trend                  |                    | 0.066   |                    | 0.074   |                    | 0.165   |
| <b>WHtR</b>                  |                    |         |                    |         |                    |         |
| Quarter 1                    | Ref.               |         | Ref.               |         | Ref.               |         |
| Quarter 2                    | 0.97(0.65, 1.45)   | 0.874   | 1.26(0.65, 2.43)   | 0.492   | 1.22(0.64, 2.32)   | 0.537   |
| Quarter 3                    | 0.84(0.55, 1.28)   | 0.413   | 0.88(0.42, 1.81)   | 0.720   | 0.81(0.39, 1.65)   | 0.559   |
| Quarter 4                    | 0.90(0.59, 1.38)   | 0.639   | 0.43(0.17, 1.08)   | 0.072   | 0.40(0.16, 0.98)   | 0.046   |
| P for trend                  |                    | 0.511   |                    | 0.060   |                    | 0.033   |
| <b>BAI</b>                   |                    |         |                    |         |                    |         |
| Quarter 1                    | Ref.               | Ref.    | Ref.               |         | Ref.               |         |
| Quarter 2                    | 0.64(0.33, 1.23)   | 0.177   | 0.60(0.18, 1.96)   | 0.396   | 0.53(0.17, 1.72)   | 0.293   |
| Quarter 3                    | 0.43(0.20, 0.92)   | 0.030   | 0.64(0.18, 2.27)   | 0.486   | 0.55(0.16, 1.91)   | 0.348   |
| Quarter 4                    | 0.51(0.23, 1.12)   | 0.095   | 0.28(0.05, 1.65)   | 0.161   | 0.37(0.08, 1.72)   | 0.202   |
| P for trend                  |                    | 0.059   |                    | 0.186   |                    | 0.200   |



**STROBE Statement—checklist of items that should be included in reports of observational studies**

| Section/item              | Item No | Recommendation                                                                                                                                                                                                                                                                                                                                                                                                                                                         | Reported on Page Number/Line Number | Reported on Section/Paragraph |
|---------------------------|---------|------------------------------------------------------------------------------------------------------------------------------------------------------------------------------------------------------------------------------------------------------------------------------------------------------------------------------------------------------------------------------------------------------------------------------------------------------------------------|-------------------------------------|-------------------------------|
| Title and abstract        | 1       | (a) Indicate the study’s design with a commonly used term in the title or the abstract                                                                                                                                                                                                                                                                                                                                                                                 |                                     |                               |
|                           |         | (b) Provide in the abstract an informative and balanced summary of what was done and what was found                                                                                                                                                                                                                                                                                                                                                                    |                                     |                               |
| <b>Introduction</b>       |         |                                                                                                                                                                                                                                                                                                                                                                                                                                                                        |                                     |                               |
| Background/ rationale     | 2       | Explain the scientific background and rationale for the investigation being reported                                                                                                                                                                                                                                                                                                                                                                                   |                                     |                               |
| Objectives                | 3       | State specific objectives, including any prespecified hypotheses                                                                                                                                                                                                                                                                                                                                                                                                       |                                     |                               |
| <b>Methods</b>            |         |                                                                                                                                                                                                                                                                                                                                                                                                                                                                        |                                     |                               |
| Study design              | 4       | Present key elements of study design early in the paper                                                                                                                                                                                                                                                                                                                                                                                                                |                                     |                               |
| Setting                   | 5       | Describe the setting, locations, and relevant dates, including periods of recruitment, exposure, follow-up, and data collection                                                                                                                                                                                                                                                                                                                                        |                                     |                               |
| Participants              | 6       | (a) <b>Cohort study</b> —Give the eligibility criteria, and the sources and methods of selection of participants. Describe methods of follow-up<br><b>Case-control study</b> —Give the eligibility criteria, and the sources and methods of case ascertainment and control selection. Give the rationale for the choice of cases and controls<br><b>Cross-sectional study</b> —Give the eligibility criteria, and the sources and methods of selection of participants |                                     |                               |
|                           |         | (b) <b>Cohort study</b> —For matched studies, give matching criteria and number of exposed and unexposed<br><b>Case-control study</b> —For matched studies, give matching criteria and the number of controls per case                                                                                                                                                                                                                                                 |                                     |                               |
| Variables                 | 7       | Clearly define all outcomes, exposures, predictors, potential confounders, and effect modifiers. Give diagnostic criteria, if applicable                                                                                                                                                                                                                                                                                                                               |                                     |                               |
| Data sources/ measurement | 8*      | For each variable of interest, give sources of data and details of methods of assessment (measurement). Describe comparability of assessment methods if there is more than one group                                                                                                                                                                                                                                                                                   |                                     |                               |
| Bias                      | 9       | Describe any efforts to address potential sources of bias                                                                                                                                                                                                                                                                                                                                                                                                              |                                     |                               |
| Study size                | 10      | Explain how the study size was arrived at                                                                                                                                                                                                                                                                                                                                                                                                                              |                                     |                               |
| Quantitative variables    | 11      | Explain how quantitative variables were handled in the analyses. If applicable, describe which groupings were chosen and why                                                                                                                                                                                                                                                                                                                                           |                                     |                               |

|                     |     |                                                                                                                                                                                                                                                                                                           |  |  |
|---------------------|-----|-----------------------------------------------------------------------------------------------------------------------------------------------------------------------------------------------------------------------------------------------------------------------------------------------------------|--|--|
| Statistical methods | 12  | (a) Describe all statistical methods, including those used to control for confounding                                                                                                                                                                                                                     |  |  |
|                     |     | (b) Describe any methods used to examine subgroups and interactions                                                                                                                                                                                                                                       |  |  |
|                     |     | (c) Explain how missing data were addressed                                                                                                                                                                                                                                                               |  |  |
|                     |     | (d) <b>Cohort study</b> —If applicable, explain how loss to follow-up was addressed<br><b>Case-control study</b> —If applicable, explain how matching of cases and controls was addressed<br><b>Cross-sectional study</b> —If applicable, describe analytical methods taking account of sampling strategy |  |  |
|                     |     | (e) Describe any sensitivity analyses                                                                                                                                                                                                                                                                     |  |  |
| <b>Results</b>      |     |                                                                                                                                                                                                                                                                                                           |  |  |
| Participants        | 13* | (a) Report numbers of individuals at each stage of study—eg numbers potentially eligible, examined for eligibility, confirmed eligible, included in the study, completing follow-up, and analysed                                                                                                         |  |  |
|                     |     | (b) Give reasons for non-participation at each stage                                                                                                                                                                                                                                                      |  |  |
|                     |     | (c) Consider use of a flow diagram                                                                                                                                                                                                                                                                        |  |  |
| Descriptive data    | 14* | (a) Give characteristics of study participants (eg demographic, clinical, social) and information on exposures and potential confounders                                                                                                                                                                  |  |  |
|                     |     | (b) Indicate number of participants with missing data for each variable of interest                                                                                                                                                                                                                       |  |  |
|                     |     | (c) <b>Cohort study</b> —Summarise follow-up time (eg, average and total amount)                                                                                                                                                                                                                          |  |  |
| Outcome data        | 15* | <b>Cohort study</b> —Report numbers of outcome events or summary measures over time                                                                                                                                                                                                                       |  |  |
|                     |     | <b>Case-control study</b> —Report numbers in each exposure category, or summary measures of exposure                                                                                                                                                                                                      |  |  |
|                     |     | <b>Cross-sectional study</b> —Report numbers of outcome events or summary measures                                                                                                                                                                                                                        |  |  |
| Main results        | 16  | (a) Give unadjusted estimates and, if applicable, confounder-adjusted estimates and their precision (eg, 95% confidence interval). Make clear which confounders were adjusted for and why they were included                                                                                              |  |  |
|                     |     | (b) Report category boundaries when continuous variables were categorized                                                                                                                                                                                                                                 |  |  |
|                     |     | (c) If relevant, consider translating estimates of relative risk into absolute risk for a meaningful time period                                                                                                                                                                                          |  |  |
| Other analyses      | 17  | Report other analyses done—eg analyses of subgroups and interactions, and sensitivity analyses                                                                                                                                                                                                            |  |  |
| <b>Discussion</b>   |     |                                                                                                                                                                                                                                                                                                           |  |  |
| Key results         | 18  | Summarise key results with reference to study objectives                                                                                                                                                                                                                                                  |  |  |
| Limitations         | 19  | Discuss limitations of the study, taking into account sources of potential bias or imprecision. Discuss both direction and magnitude of any potential bias                                                                                                                                                |  |  |

1  
2  
3  
4  
5  
6  
7  
8  
9  
10  
11  
12  
13  
14  
15  
16  
17  
18  
19  
20  
21  
22  
23  
24  
25  
26  
27  
28  
29  
30  
31  
32  
33  
34  
35  
36  
37  
38  
39  
40  
41  
42  
43  
44  
45  
46

|                          |    |                                                                                                                                                                            |  |  |
|--------------------------|----|----------------------------------------------------------------------------------------------------------------------------------------------------------------------------|--|--|
| Interpretation           | 20 | Give a cautious overall interpretation of results considering objectives, limitations, multiplicity of analyses, results from similar studies, and other relevant evidence |  |  |
| Generalisability         | 21 | Discuss the generalisability (external validity) of the study results                                                                                                      |  |  |
| <b>Other information</b> |    |                                                                                                                                                                            |  |  |
| Funding                  | 22 | Give the source of funding and the role of the funders for the present study and, if applicable, for the original study on which the present article is based              |  |  |

\*Give information separately for cases and controls in case-control studies and, if applicable, for exposed and unexposed groups in cohort and cross-sectional studies.

**Note:** An Explanation and Elaboration article discusses each checklist item and gives methodological background and published examples of transparent reporting. The STROBE checklist is best used in conjunction with this article (freely available on the Web sites of PLoS Medicine at <http://www.plosmedicine.org/>, Annals of Internal Medicine at <http://www.annals.org/>, and Epidemiology at <http://www.epidem.com/>). Information on the STROBE Initiative is available at [www.strobe-statement.org](http://www.strobe-statement.org).

# BMJ Open

## Association of Different Kinds of Obesity with Diabetic Retinopathy in Patients with Type 2 Diabetes

|                                 |                                                                                                                                                                                                                                                                                                                                                                                                                                                                                                                                                                                                                                                                                            |
|---------------------------------|--------------------------------------------------------------------------------------------------------------------------------------------------------------------------------------------------------------------------------------------------------------------------------------------------------------------------------------------------------------------------------------------------------------------------------------------------------------------------------------------------------------------------------------------------------------------------------------------------------------------------------------------------------------------------------------------|
| Journal:                        | <i>BMJ Open</i>                                                                                                                                                                                                                                                                                                                                                                                                                                                                                                                                                                                                                                                                            |
| Manuscript ID                   | bmjopen-2021-056332.R1                                                                                                                                                                                                                                                                                                                                                                                                                                                                                                                                                                                                                                                                     |
| Article Type:                   | Original research                                                                                                                                                                                                                                                                                                                                                                                                                                                                                                                                                                                                                                                                          |
| Date Submitted by the Author:   | 19-Feb-2022                                                                                                                                                                                                                                                                                                                                                                                                                                                                                                                                                                                                                                                                                |
| Complete List of Authors:       | Li, Wangting; Sun Yat-Sen University Zhongshan Ophthalmic Center<br>Gong, Xia; Sun Yat-Sen University Zhongshan Ophthalmic Center<br>Wang, Wei; Sun Yat-Sen University Zhongshan Ophthalmic Center<br>Xiong, Kun; Sun Yat-Sen University Zhongshan Ophthalmic Center<br>Meng, Jie; Sun Yat-Sen University Zhongshan Ophthalmic Center<br>Li, Yuting; Sun Yat-Sen University Zhongshan Ophthalmic Center<br>Wang, Lanhua; Sun Yat-Sen University Zhongshan Ophthalmic Center<br>Liang, Xiaoling; Sun Yat-Sen University Zhongshan Ophthalmic Center<br>Jin, Ling; Sun Yat-Sen University Zhongshan Ophthalmic Center<br>Huang, Wenyong; Sun Yat-Sen University Zhongshan Ophthalmic Center, |
| <b>Primary Subject Heading</b>: | Diabetes and endocrinology                                                                                                                                                                                                                                                                                                                                                                                                                                                                                                                                                                                                                                                                 |
| Secondary Subject Heading:      | Epidemiology                                                                                                                                                                                                                                                                                                                                                                                                                                                                                                                                                                                                                                                                               |
| Keywords:                       | Diabetic retinopathy < DIABETES & ENDOCRINOLOGY, DIABETES & ENDOCRINOLOGY, NUTRITION & DIETETICS                                                                                                                                                                                                                                                                                                                                                                                                                                                                                                                                                                                           |
|                                 |                                                                                                                                                                                                                                                                                                                                                                                                                                                                                                                                                                                                                                                                                            |

SCHOLARONE™  
Manuscripts



I, the Submitting Author has the right to grant and does grant on behalf of all authors of the Work (as defined in the below author licence), an exclusive licence and/or a non-exclusive licence for contributions from authors who are: i) UK Crown employees; ii) where BMJ has agreed a CC-BY licence shall apply, and/or iii) in accordance with the terms applicable for US Federal Government officers or employees acting as part of their official duties; on a worldwide, perpetual, irrevocable, royalty-free basis to BMJ Publishing Group Ltd ("BMJ") its licensees and where the relevant Journal is co-owned by BMJ to the co-owners of the Journal, to publish the Work in this journal and any other BMJ products and to exploit all rights, as set out in our [licence](#).

The Submitting Author accepts and understands that any supply made under these terms is made by BMJ to the Submitting Author unless you are acting as an employee on behalf of your employer or a postgraduate student of an affiliated institution which is paying any applicable article publishing charge ("APC") for Open Access articles. Where the Submitting Author wishes to make the Work available on an Open Access basis (and intends to pay the relevant APC), the terms of reuse of such Open Access shall be governed by a Creative Commons licence – details of these licences and which [Creative Commons](#) licence will apply to this Work are set out in our licence referred to above.

Other than as permitted in any relevant BMJ Author's Self Archiving Policies, I confirm this Work has not been accepted for publication elsewhere, is not being considered for publication elsewhere and does not duplicate material already published. I confirm all authors consent to publication of this Work and authorise the granting of this licence.

1  
2  
3  
4 **1 Title Page**

5  
6 **2 Association of Different Kinds of Obesity with Diabetic Retinopathy in Patients**  
7  
8  
9 **3 with Type 2 Diabetes**

10  
11  
12  
13  
14  
15  
16  
17  
18  
19  
20  
21  
22  
23  
24  
25  
26  
27  
28  
29  
30  
31  
32  
33  
34  
35  
36  
37  
38  
39  
40  
41  
42  
43  
44  
45  
46  
47  
48  
49  
50  
51  
52  
53  
54  
55  
56  
57  
58  
59  
60  
Wangting Li, M.D.<sup>1,\*</sup>; Xia Gong, M.D.<sup>1,\*</sup>; Wei Wang, M.D., Ph.D.<sup>1,&</sup>; Kun Xiong, M.D.<sup>1</sup>; Jie  
Meng, M.D.<sup>1</sup>; Yuting Li, M.P.H.<sup>1</sup>; Lanhua Wang, M.D., Ph.D.<sup>1</sup>; Xiaoling Liang, M.D., Ph.D.<sup>1</sup>;  
Ling Jin, M.P.H.<sup>1</sup>; Wenyong Huang, M.D., Ph.D.<sup>1,&#</sup>

8  
9 Institutions:

10 <sup>1</sup> State Key Laboratory of Ophthalmology, Zhongshan Ophthalmic Center, Sun Yat-sen  
11 University, Guangzhou, Guangdong, 510000, People's Republic of China.

12 \* Co-first author

13 & Co-senior author

14 # Correspondence: Wenyong Huang, M.D., Ph.D.

15 Professor of Ophthalmology, Vice-director of the Department of Preventive Ophthalmology,  
16 Zhongshan Ophthalmic Center, State Key Laboratory of Ophthalmology, Sun Yat-sen  
17 University, Guangzhou, China, 510000, Email: [huangwenyong@gzzoc.com](mailto:huangwenyong@gzzoc.com)

18 Word count for text: 2802

1  
2  
3  
4 **19 Abstract**

5  
6 **20 Introduction** Although obesity is one of the established risk factors of diabetes mellitus, the  
7  
8  
9  
10  
11  
12  
13  
14  
15  
16  
17  
18  
19  
20  
21 relationship between obesity and diabetic retinopathy (DR) remains unclear in different studies. This  
22  
23 study aimed to investigate the association of diabetic retinopathy (DR) with four obesity-related  
24  
25 indexes, including body mass index (BMI), waist to hip ratio (WHR), waist to height ratio (WHtR) and  
26  
27 body adiposity index (BAI) in diabetic patients.

28  
29  
30  
31  
32  
33  
34  
35  
36  
37  
38  
39  
40  
41  
42  
43  
44  
45  
46  
47  
48  
49  
50  
51  
52  
53  
54  
55  
56  
57  
58  
59  
60  
**25 Research Design and Methods** We prospectively enrolled 2305 diabetic patients (2305 eyes) in the  
26  
27 Guangzhou Diabetic Eye Study (GDES) between Nov2017 and Dec 2019 to investigate the prevalence  
28  
29 and the association of different types of obesity with DR using BMI, WHR, WHtR and BAI. DR,  
30  
31 diabetic macular edema (DME) and vision-threatening diabetic retinopathy(VTDR) were selected as  
32  
33 primary outcomes. BMI was categorized as normal (18.5-22.9kg/m<sup>2</sup>), overweight(23.0-25.0kg/m<sup>2</sup>), and  
34  
35 obese(>25.0kg/m<sup>2</sup>); WHR, WHtR and BAI were categorized into quarters.

36  
37  
38  
39  
40  
41  
42  
43  
44  
45  
46  
47  
48  
49  
50  
51  
52  
53  
54  
55  
56  
57  
58  
59  
60  
**31 Results** A total of 336 (14.58%), 93 (4.03%) and 98 (4.25%) developed DR, DME and VTDR  
32  
33 respectively. The prevalence of DR, DME and VTDR was higher in patients with higher BMI/WHR or  
34  
35 lower WHtR/BAI. In the univariate regression model, WHR correlated positively with DR, while WHtR  
36  
37 and BAI correlated negatively with DR, DME and VTDR. The association remained independent of  
38  
39 age, sex and lipid metabolism parameters. In the multivariate model, obese presented as a protective  
40  
41 factor for DME and VTDR, while the second quarter of WHtR(Q2-WHtR) presented as a risk factor.

42  
43  
44  
45  
46  
47  
48  
49  
50  
51  
52  
53  
54  
55  
56  
57  
58  
59  
60  
**37 Conclusions** As high as 67.8% of diabetic patients were overweight or obese. Obese presented as a  
38  
39 significant protective factor of VTDR, while Q2-WHtR presented as a significant risk factor. Therefore,  
40  
41 more attention should be paid to centripetal obesity as well as general obesity. Further research is also  
42  
43 needed to focus on the improvement of sex-specific weight management in diabetic patients.

1  
2  
3  
4 41

5  
6 42 **Keywords** Diabetes mellitus, diabetic retinopathy, obesity, BMI, WHR, WHtR, BAI

7  
8  
9 43

10  
11 44 **Article summary: (Strengths and limitations of this study)**

12  
13  
14 45 1. This study is a combined study that analyzed the association of four obesity-related indexes

15  
16  
17 46 (BMI, WHR, WHtR, and BAI) with the presence and the severity of diabetic retinopathy.

18  
19  
20 47 2. Any diabetic retinopathy, diabetic macular edema (DME), and vision-threatening diabetic

21  
22 48 retinopathy (VTDR) were selected as primary outcomes.

23  
24  
25 49 3. DR and DME were diagnosed and graded according to the International Clinical Severity

26  
27 50 Scale of Diabetic Retinopathy and Diabetic Macular Edema (Figure 1), using 7-position fundus

28  
29  
30 51 photos of participants.

31  
32 52 4. To reduce the examination time and improve the compliance of participants, the

33  
34  
35 53 measurement of waist circumference and hip circumference was not performed on every

36  
37  
38 54 participant, while eventually 483 patients have undergone all the measurements.

39  
40 55 5. The diabetic participants with severe conditions (e.g. very poor eyesight, past DR treatment

41  
42  
43 56 history, occurred with other combined eye diseases that could affect the retinal thickness, etc.)

44  
45  
46 57 were excluded from our study.

47  
48 58



## 59 **Introduction**

60 Diabetic retinopathy (DR) is one of the most common complications of diabetes mellitus  
61 and is a leading cause of vision loss and blindness throughout the world<sup>1</sup>. It severely affects the  
62 life quality of diabetic patients and increases the economic burden of treatment without timely  
63 management<sup>1</sup>. Although obesity is one of the established risk factors that correlated positively  
64 with diabetes mellitus<sup>2,3</sup>, the relationship between obesity and DR varies in different studies.  
65 For instance, in a cross-sectional study that enrolled 50,464 Saudi diabetic patients, overweight  
66 and obesity presented as a protective factor for DR<sup>4</sup>. However, in a meta-analysis of prospective  
67 cohort studies, obesity correlated with a significant increase in DR incidence<sup>5</sup>. The methods to  
68 improve the weight management of diabetic patients to decrease the presence and severity of  
69 DR have become a major public health problem.

70 Body mass index (BMI) has been commonly used to assess weight level in the previous  
71 study<sup>4,6,7</sup>, but it could not distinguish whether a patient is general obese or abdominal obese.  
72 Moreover, combined or separate studies about the association of waist to hip ratio (WHR), waist  
73 to height ratio (WHtR), and body adiposity index (BAI) with DR are still limited. Studies to  
74 explore the relationship between obesity and DR among Chinese people are also limited.

75 Therefore, this study assessed the association of obesity-related indexes with DR, diabetic  
76 macular edema (DME), and vision-threatening diabetic retinopathy (VTDR) among T2DM  
77 patients using the data of the Guangzhou Diabetic Eye Study in China.

## 79 **Methods**

### 80 **Study design and participants**

1  
2  
3  
4 81 The Guangzhou Diabetic Eye Study (GDES) is an ongoing prospective study that enrolled  
5  
6 82 diabetes patients from communities in Guangzhou. Before enrollment, the participants were  
7  
8  
9 83 diagnosed with diabetes in the general hospitals, and were registered and followed up in the  
10  
11 84 community health centers. They were referred to Zhongshan Ophthalmic Center and underwent  
12  
13  
14 85 ophthalmic examinations and physical examinations at the baseline visit, one-year visit, and  
15  
16  
17 86 two-year visit. Demographic information and medical history were also collected at the same  
18  
19 87 time. However, patients with any evidence of the following conditions were excluded: (I) best  
20  
21  
22 88 corrected visual acuity (BCVA) worse than 20/200, axial length > 30 mm or unmeasurable,  
23  
24  
25 89 spherical equivalent (SphE)  $\leq$  -12.0 degrees, astigmatism > 4 degrees, or intraocular pressure  
26  
27 90 (IOP) > 21 mmHg in the right eye; (II) except DR, other combined eye diseases that could  
28  
29  
30 91 affect retinal thickness in the right eye, such as glaucoma, age-related macular degeneration,  
31  
32  
33 92 and retinal detachment; (III) surgery or invasive treatment or laser treatment history on the right  
34  
35  
36 93 eye; (IV) severe systemic diseases, such as uncontrolled hypertension, severe cardiovascular  
37  
38  
39 94 and cerebrovascular disease, malignant tumors, and nephritis; (V) general surgery history, such  
40  
41  
42 95 as heart bypass, thrombolysis, and kidney transplantation; (VI) cognitive disorders or mental  
43  
44  
45 96 illness that would hinder the patient's cooperation with tests; and (VII) inability to obtain clear  
46  
47  
48 97 fundus or SS-OCT images because of refractive media opacity or non-cooperation.

48 98 A total of 2372 diabetic patients participated and completed the examinations between  
49  
50  
51 99 Nov 2017 and Dec 2019. Sixty-seven participants with ungradable fundus images were  
52  
53  
54 100 excluded, and 2305 participants were finally included. The baseline data of demographic  
55  
56  
57 101 information, medical history, ophthalmic examinations, and physical examinations were  
58  
59  
60 102 extracted in the analysis. There was no missing data in the study.

1  
2  
3  
4 103 This study followed the tenets of the Declaration of Helsinki and was approved by the  
5  
6 104 Institutional Review Board of Zhongshan Ophthalmic Center (2017KYPJ094), Guangzhou,  
7  
8  
9 105 China. Written informed consent was obtained from all participants. Patient records and  
10  
11  
12 106 information were anonymized and de-identified before analysis.

#### 107 **Demographic information, medical history, and biometric parameter assessment**

108 Demographic information and medical history (e.g., age, sex, education, smoking and  
109 drinking history, duration of diabetes, and insulin use) were collected using a standardized  
110 questionnaire. The previous medical records would be checked and confirmed by the doctors.  
111 The physical examination, including a blood pressure test, blood test, biochemical test, and  
112 urine test, was carried out by a certified nurse.

#### 113 **Assessment of BMI, WHR, WHtR, and BAI**

114 The participants' weight (in kilograms), height (in meters), waist circumference (in  
115 centimeters), and hip circumference were measured by certified nurses. Participants were  
116 required to remove their shoes and the heavy object (e.g., mobile phones, keys, and wallets) on  
117 them. Weight was measured using a weight scale. Height was measured using a measuring stick  
118 on the weight scale. Waist and hip circumferences were assessed using a nonstretchable medical  
119 tape. Waist circumference was taken at the smallest horizontal girth between the costal margins  
120 and the iliac crests at the end of tidal expiration. Hip circumference was taken at the maximal  
121 protuberance of the buttocks. Every participant underwent the weight and height measurement,  
122 while 483 consecutive participants underwent hip circumference measurement, and 1484  
123 consecutive participants underwent waist circumference measurement.

124 BMI was calculated as weight divided by height squared and was categorized into normal

1  
2  
3  
4 125 weight (18.5-22.9 kg/m<sup>2</sup>), overweight (23.0-25.0 kg/m<sup>2</sup>), and obese (>25.0 kg/m<sup>2</sup>), according  
5  
6 126 to Asia-Pacific BMI cutoff points<sup>8-10</sup>. Sixty underweight participants (BMI <18.5 kg/m<sup>2</sup>) were  
7  
8  
9 127 not included because of the small sample size. WHR was calculated as waist circumference  
10  
11 128 divided by hip circumference, while WHtR was calculated by dividing waist circumference by  
12  
13  
14 129 height. BAI was calculated as hip circumference divided by (height)<sup>1.5</sup> minus 18. Because of  
15  
16  
17 130 the lack of standardized classifications, WHR, WHtR, and BAI were categorized in quarters.

### 131 **Assessment of DR, DME, and VTDR**

132 All the participants underwent ophthalmic examinations including vision test, intraocular  
133 pressure test, anterior segment examination, intraocular lens (IOL) master test, mydriatic  
134 fundus photography, and optical coherence tomography examination, by trained  
135 ophthalmologists.

136 DR and DME were diagnosed and graded according to the International Clinical Severity  
137 Scale of Diabetic Retinopathy and Diabetic Macular Edema (Figure 1), using 7-position fundus  
138 photos of participants. Any DR, DME, and VTDR were selected as primary outcomes. Any DR  
139 was defined as the presence of mild non-proliferative diabetic retinopathy (NPDR), moderate  
140 NPDR, severe NPDR, or PDR. VTDR was defined as the presence of DME or PDR. For each  
141 participant, only the data of the worse eye would be used. If the DR grades of both eyes were  
142 consistent, then the right eye would be selected for analysis.

### 143 **Statistical analysis**

144 All analyses were performed using STATA statistical software (Stata version 14.0, Stata  
145 Corp., College Station, TX). BMI, WHR, WHtR, and BAI classifications were used as both  
146 continuous variables and categorical variables. To compare the differences in characteristics of

1  
2  
3  
4 147 participants with or without DR, DME, and VTDR, the Student t-test was used for continuous  
5  
6 148 variables that were normally distributed, the Mann-Whitney U test was used for other  
7  
8  
9 149 continuous variables (creatinine and microalbuminuria), and the Chi-square test was used for  
10  
11  
12 150 categorical variables.

13  
14 151 The binary and ordinal logistic regression model was used to assess the association of BMI,  
15  
16 152 WHR, WHtR, and BAI with the presence of any DR and VTDR. In special, the outcome of the  
17  
18  
19 153 ordinal logistic regression model of DR was set as no DR, mild NPDR, moderate NPDR, and VTDR  
20  
21  
22 154 (including PDR and DME). In the multivariate logistic model, the association was adjusted for  
23  
24  
25 155 potential confounding factors established in previous research. These factors included continuous  
26  
27 156 variables (e.g., age, systolic blood pressure, HbA1c, c-reaction protein, total cholesterol, triglycerides,  
28  
29  
30 157 low-density cholesterol, high-density cholesterol, creatinine, microalbuminuria, uric acid, and axial  
31  
32  
33 158 length) and categorical variables (e.g., sex, smoking history, drinking history, education, duration of  
34  
35 159 diabetes, and insulin use). P values less than 0.05 were considered statistically significant.

#### 36 37 38 160 **Patient and public involvement statement**

39  
40 161 Patients and/or the public were not involved in the design, or conduct, or reporting, or  
41  
42  
43 162 dissemination plans of this research.

44  
45  
46 163

#### 47 48 49 50 164 **Results**

51  
52 165 In general, 336 (14.58%) participants developed DR, including 76 (3.30%) patients with  
53  
54  
55 166 mild NPDR, 197 (8.55%) patients with moderate NPDR, 45 (1.95%) patients with severe  
56  
57  
58 167 NPDR, 17 (0.74%) patients with PDR, and 93 (4.03%) patients with DME. 98 (4.25%) patients  
59  
60

1  
2  
3  
4 168 developed VTDR.  
5

6 169 Compared with participants who did not have DR, participants with DR had a younger  
7  
8  
9 170 age, a lower level of education, a longer duration of diabetes, and a higher proportion of males,  
10  
11 171 smoking history, drinking history, and insulin use (Table 1). They also had a higher level of  
12  
13 172 HbA1c, creatinine, microalbuminuria, and systolic blood pressure, but shorter axis length (all p  
14  
15 173 <0.05). Moreover, their BMI, WHR, WHtR, and BAI were higher. According to Asia-Pacific  
16  
17 174 BMI cutoff points, as high as 947 participants (41.1%) were obese, and 615 (26.7%) were  
18  
19 175 overweight, while only 683 participants (29.6%) were normal weight.  
20  
21  
22  
23  
24

#### 25 176 **Association of BMI with any DR, DME and VTDR**

26  
27 177 The prevalence of any DR, DME and VTDR in overweight diabetic patients was higher  
28  
29 178 than that in patients who were normal weight or obese (Figure 2, Table 2). However, there was  
30  
31 179 no significance in the association of BMI with any DR in the univariate binary or ordinal logistic  
32  
33 180 model.  
34  
35  
36  
37

38 181 After adjusted for sex and age, obesity presented as a protective factor for VTDR (odds  
39  
40 182 ratio [or]=0.57, [95%CI, 0.33-0.96], p for trend = 0.028, Supplementary Table S1). The  
41  
42 183 association remained after the regression model was additionally adjusted for lipid metabolism  
43  
44 184 parameter (Supplementary Table S2).  
45  
46  
47

48 185 In the full model that further adjusted for continuous variables (age, systolic blood pressure,  
49  
50 186 HbA1c, c-reaction protein, total cholesterol, triglycerides, low-density cholesterol, high-density  
51  
52 187 cholesterol, creatinine, microalbuminuria, uric acid, and axial length) and categorical variables  
53  
54 188 (sex, smoking history, drinking history, education, duration of diabetes, and insulin use), the  
55  
56 189 association of BMI became significant with both DME and VTDR (for DME, p for trend =  
57  
58  
59  
60

**Table 1. The characteristics of participants with or without diabetic retinopathy (DR), diabetic macular edema (DME) and vision threatening diabetic retinopathy (VTDR).** Footnotes: BMI: Body mass index. WHR: Waist to hip ratio. WHtR: waist to height ratio. BAI: Body adiposity index.

|                                                   | DR<br>n=336 | No DR<br>n=1970 | DME<br>n=93 | No DME<br>n=2212 | VTDR<br>n=98 | No VTDR<br>n=2207 |
|---------------------------------------------------|-------------|-----------------|-------------|------------------|--------------|-------------------|
| <b>Medical history</b>                            |             |                 |             |                  |              |                   |
| Age, median (IQR), year                           | 64.0(10.0)  | 65.0(10.0)      | 62.0(9.0)   | 65.0(10.0)       | 61.5(9.0)    | 65.0(10.0)        |
| Sex, %                                            |             |                 |             |                  |              |                   |
| Female                                            | 49.4        | 58.35           | 43.01       | 57.64            | 42.86        | 57.68             |
| Male                                              | 50.6        | 41.65           | 56.99       | 42.36            | 57.14        | 42.32             |
| Smoking history, %                                |             |                 |             |                  |              |                   |
| No                                                | 81.88       | 86.29           | 83.12       | 85.76            | 82.5         | 85.79             |
| Yes                                               | 18.12       | 13.71           | 16.88       | 14.24            | 17.5         | 14.21             |
| Drinking history, %                               |             |                 |             |                  |              |                   |
| No                                                | 88.04       | 91.18           | 89.61       | 90.78            | 87.5         | 90.87             |
| Yes                                               | 11.96       | 8.82            | 10.39       | 9.22             | 12.5         | 9.13              |
| Education, %                                      |             |                 |             |                  |              |                   |
| Educated                                          | 16.42       | 11.26           | 16          | 11.83            | 15.09        | 11.85             |
| Not educated                                      | 83.58       | 88.74           | 84          | 88.17            | 84.91        | 88.15             |
| Diabetes duration, %, year                        |             |                 |             |                  |              |                   |
| <5                                                | 18.15       | 39.21           | 21.51       | 36.75            | 20.41        | 36.84             |
| 5-9                                               | 20.24       | 26.16           | 17.2        | 25.63            | 17.35        | 25.65             |
| 10-19                                             | 40.48       | 27.37           | 45.16       | 28.62            | 44.9         | 28.59             |
| ≥20                                               | 21.13       | 7.26            | 16.13       | 9                | 17.35        | 8.93              |
| Taking insulin, %                                 |             |                 |             |                  |              |                   |
| No                                                | 52.38       | 82.73           | 51.61       | 79.43            | 51.02        | 79.52             |
| Yes                                               | 47.62       | 17.27           | 48.39       | 20.57            | 48.98        | 20.48             |
| Examination and laboratory tests,<br>median (IQR) |             |                 |             |                  |              |                   |

|    |                               |                |                |                |                |                |                |
|----|-------------------------------|----------------|----------------|----------------|----------------|----------------|----------------|
| 1  |                               |                |                |                |                |                |                |
| 2  |                               |                |                |                |                |                |                |
| 3  |                               |                |                |                |                |                |                |
| 4  |                               |                |                |                |                |                |                |
| 5  | Systolic blood pressure, mmHg | 136.00(26.00)  | 133.00(24.00)  | 133.00(28.00)  | 134.00(24.00)  | 132.50(27.50)  | 134.00(24.00)  |
| 6  | bmi                           | 23.97(3.52)    | 24.40(4.06)    | 23.72(3.09)    | 24.38(3.99)    | 23.59(2.67)    | 24.39(4.02)    |
| 7  | whr                           | 0.91(0.09)     | 0.90(0.07)     | 0.93(0.07)     | 0.90(0.08)     | 0.91(0.08)     | 0.90(0.08)     |
| 8  | whtr                          | 0.53(0.07)     | 0.54(0.07)     | 0.52(0.06)     | 0.54(0.07)     | 0.52(0.06)     | 0.54(0.07)     |
| 9  | BAI                           | 27.48(5.13)    | 28.86(5.12)    | 26.89(3.70)    | 28.74(5.28)    | 26.89(3.99)    | 28.74(5.27)    |
| 10 | Hba1c, %                      | 7.80(2.20)     | 6.60(1.30)     | 8.00(2.40)     | 6.60(1.40)     | 8.00(2.50)     | 6.60(1.40)     |
| 11 | C-reaction protein            | 1.35(2.03)     | 1.47(2.00)     | 1.19(1.68)     | 1.45(2.02)     | 1.17(1.69)     | 1.46(2.02)     |
| 12 | Total cholesterol             | 4.73(1.37)     | 4.78(1.40)     | 4.91(1.55)     | 4.77(1.38)     | 4.90(1.56)     | 4.77(1.38)     |
| 13 | Triglycerides                 | 1.90(1.60)     | 1.91(1.58)     | 1.96(1.50)     | 1.90(1.58)     | 1.99(1.49)     | 1.90(1.58)     |
| 14 | Low-density cholesterol       | 2.97(1.16)     | 3.00(1.28)     | 3.16(1.24)     | 2.98(1.25)     | 3.15(1.23)     | 2.98(1.25)     |
| 15 | High-density cholesterol      | 1.22(0.47)     | 1.22(0.51)     | 1.21(0.50)     | 1.22(0.50)     | 1.21(0.50)     | 1.22(0.50)     |
| 16 | Creatinine                    | 76.00(28.00)   | 69.00(25.00)   | 79.00(26.00)   | 70.00(25.00)   | 80.00(27.00)   | 70.00(25.00)   |
| 17 | Microalbuminuria              | 1.96(8.22)     | 0.85(2.29)     | 2.54(9.62)     | 0.91(2.48)     | 2.54(9.89)     | 0.91(2.48)     |
| 18 | Uric acid                     | 374.00(123.00) | 368.00(128.00) | 357.00(144.00) | 369.00(128.00) | 355.50(132.00) | 369.00(128.00) |
| 19 | Axial length, mm              | 23.25(1.20)    | 23.44(1.19)    | 23.19(1.15)    | 23.43(1.20)    | 23.16(1.17)    | 23.43(1.20)    |
| 20 |                               |                |                |                |                |                |                |
| 21 |                               |                |                |                |                |                |                |
| 22 |                               |                |                |                |                |                |                |
| 23 |                               |                |                |                |                |                |                |
| 24 |                               |                |                |                |                |                |                |
| 25 |                               |                |                |                |                |                |                |
| 26 |                               |                |                |                |                |                |                |
| 27 |                               |                |                |                |                |                |                |
| 28 |                               |                |                |                |                |                |                |
| 29 |                               |                |                |                |                |                |                |
| 30 |                               |                |                |                |                |                |                |
| 31 |                               |                |                |                |                |                |                |
| 32 |                               |                |                |                |                |                |                |
| 33 |                               |                |                |                |                |                |                |
| 34 |                               |                |                |                |                |                |                |
| 35 |                               |                |                |                |                |                |                |
| 36 |                               |                |                |                |                |                |                |
| 37 |                               |                |                |                |                |                |                |
| 38 |                               |                |                |                |                |                |                |
| 39 |                               |                |                |                |                |                |                |
| 40 |                               |                |                |                |                |                |                |
| 41 |                               |                |                |                |                |                |                |
| 42 |                               |                |                |                |                |                |                |
| 43 |                               |                |                |                |                |                |                |
| 44 |                               |                |                |                |                |                |                |
| 45 |                               |                |                |                |                |                |                |
| 46 |                               |                |                |                |                |                |                |



1  
2  
3  
4 190 0.031; for VTDR,  $p$  for trend = 0.016, Table 3). Obesity was inversely associated with DME  
5  
6 191 and VTDR with a decreased OR (for DME,  $or=0.40$ , [95%CI, 0.16-0.96]; for VTDR,  $or=0.37$ ,  
7  
8  
9 192 [95%CI, 0.16-0.87], Table 3). However, the association was only significant in female patients  
10  
11 193 (for DME,  $p$  for trend =0.021, or of obesity =0.10, [95%CI, 0.01-0.77]; for VTDR,  $p$  for trend  
12  
13  
14 194 =0.015, or of obesity =0.09, [95%CI, 0.01-0.76], Table S3-1), but not in male patients (Table  
15  
16  
17 195 S3-2).

#### 196 **Association of WHR with any DR and severe DR**

197 The prevalence of DR, DME and VTDR was the highest in the fourth quarter of WHR  
198 (Q4-WHR) (Figure 2, Table 2). In the univariable logistic regression model, Q4-WHR  
199 presented as a risk factor for DR (in the binary model,  $or=2.17$ , [95%CI, 1.13-4.17]; in the  
200 ordinal model,  $or=2.25$ , [95%CI, 1.18-4.32], Table 4). When DME and VTDR were set as the  
201 outcome of the model, WHR presented a similar trend, although it was not significant.

202 After the logistic regression model was adjusted for sex and age, Q4-WHR remained a risk  
203 factor for DR ( $or=2.02$ , [95% CI, 1.03-3.98], Supplementary Table S1). The association  
204 remained independent of the lipid metabolism parameter (Supplementary Table S2). However,  
205 in the full model, the association of WHR with DR and severe DR presented a similar trend,  
206 but was not significant (Table 3).

#### 207 **Association of WHtR with any DR and severe DR**

208 The prevalence of DR decreased slightly with the growth of WHtR, while the prevalence  
209 of DME and VTDR was the highest in the Q2-WHtR, and then decreased (Table 2). In the  
210 univariate regression model, Q4-WHtR presented as a significant protective factor for DME  
211 ( $or=0.36$ , [95%CI, 0.15-0.86], Table 4) and VTDR, ( $or=0.34$ , [95%CI, 0.14-0.81]).

**Table 2. The prevalence of DR, DME and VTDR in different groups of the obesity-related indexes.**

|                                 | No. of patients | DR prevalence, % | DME prevalence, % | VTDR prevalence, % |
|---------------------------------|-----------------|------------------|-------------------|--------------------|
| BMI, kg/m <sup>2</sup> (n=2245) |                 |                  |                   |                    |
| 18.5-22.9 (normal weight)       | 683             | 14.20            | 4.25              | 4.54               |
| 23.0-25.0 (over weight)         | 615             | 17.24            | 4.88              | 5.37               |
| ≥25.0 (obese)                   | 947             | 12.99            | 2.96              | 2.96               |
| WHR, (n=483)                    |                 |                  |                   |                    |
| Quarter 1                       | 124             | 13.71            | 2.42              | 3.23               |
| Quarter 2                       | 117             | 17.95            | 5.13              | 5.13               |
| Quarter 3                       | 121             | 11.57            | 1.65              | 2.48               |
| Quarter 4                       | 121             | 25.62            | 8.26              | 8.26               |
| WHtR, (n=1484)                  |                 |                  |                   |                    |
| Quarter 1                       | 371             | 16.17            | 5.12              | 5.39               |
| Quarter 2                       | 373             | 16.09            | 5.90              | 6.17               |
| Quarter 3                       | 369             | 14.09            | 4.07              | 4.07               |
| Quarter 4                       | 371             | 14.29            | 1.89              | 1.89               |
| BAI, (n=483)                    |                 |                  |                   |                    |
| Quarter 1                       | 121             | 26.45            | 7.44              | 8.26               |
| Quarter 2                       | 121             | 17.36            | 4.13              | 4.13               |
| Quarter 3                       | 121             | 12.40            | 4.13              | 4.13               |
| Quarter 4                       | 120             | 14.17            | 1.67              | 2.50               |

**Table 3 The OR of BMI, WHR, WHtR, and BAI in the binary logistic regression model additionally adjusted for other variables in all patients.**

Footnotes: These variables included continuous variables (e.g., age, systolic blood pressure, HbA1c, c-reaction protein, total cholesterol, triglycerides, low-density cholesterol, high-density cholesterol, creatinine, microalbuminuria, uric acid, and axial length) and categorical variables (e.g., sex, smoking history, drinking history, education, duration of diabetes, and insulin use). DR, DME and VTDR were set as outcomes of the regression model, respectively.

|                              | DR                 |         | DME                |         | VTDR               |         |
|------------------------------|--------------------|---------|--------------------|---------|--------------------|---------|
|                              | Odds ratio (95%CI) | P value | Odds ratio (95%CI) | P value | Odds ratio (95%CI) | P value |
| <b>BMI, kg/m<sup>2</sup></b> |                    |         |                    |         |                    |         |
| 18.5-22.9 (normal weight)    | Ref.               |         | Ref.               |         | Ref.               |         |
| 23.0-25.0 (overweight)       | 0.82(0.52, 1.29)   | 0.393   | 1.01(0.43, 2.37)   | 0.989   | 1.03(0.46, 2.32)   | 0.946   |
| ≥25.0 (obese)                | 0.72(0.47, 1.10)   | 0.131   | 0.40(0.16, 0.96)   | 0.041   | 0.37(0.16, 0.87)   | 0.023   |
| P for trend                  |                    | 0.134   |                    | 0.031   |                    | 0.016   |
| <b>WHR</b>                   |                    |         |                    |         |                    |         |
| Quarter 1                    | Ref.               |         | Ref.               |         | Ref.               |         |
| Quarter 2                    | 0.94(0.39, 2.29)   | 0.900   | 2.77(0.30, 25.73)  | 0.370   | 1.56(0.22, 10.86)  | 0.655   |
| Quarter 3                    | 0.49(0.19, 1.25)   | 0.136   | 0.79(0.09, 6.96)   | 0.830   | 0.62(0.11, 3.35)   | 0.579   |
| Quarter 4                    | 1.06(0.46, 2.45)   | 0.893   | 3.21(0.42, 24.78)  | 0.263   | 1.98(0.34, 11.61)  | 0.450   |
| P for trend                  |                    | 0.834   |                    | 0.459   |                    | 0.645   |
| <b>WHtR</b>                  |                    |         |                    |         |                    |         |
| Quarter 1                    | Ref.               |         | Ref.               |         | Ref.               |         |
| Quarter 2                    | 1.07(0.61, 1.87)   | 0.820   | 3.04(1.04, 8.85)   | 0.041   | 2.74(1.01, 7.43)   | 0.048   |
| Quarter 3                    | 0.64(0.35, 1.16)   | 0.142   | 1.13(0.31, 4.03)   | 0.856   | 0.93(0.28, 3.07)   | 0.906   |
| Quarter 4                    | 0.81(0.44, 1.48)   | 0.494   | 0.57(0.13, 2.59)   | 0.468   | 0.48(0.11, 2.09)   | 0.330   |
| P for trend                  |                    | 0.234   |                    | 0.252   |                    | 0.133   |
| <b>BAI</b>                   |                    |         |                    |         |                    |         |
| Quarter 1                    | Ref.               |         | Ref.               |         | Ref.               |         |
| Quarter 2                    | 0.77(0.35, 1.69)   | 0.512   | 1.15(0.29, 4.52)   | 0.845   | 1.05(0.29, 3.74)   | 0.943   |
| Quarter 3                    | 0.60(0.26, 1.37)   | 0.226   | 0.89(0.19, 4.13)   | 0.879   | 0.77(0.19, 3.08)   | 0.706   |
| Quarter 4                    | 0.57(0.23, 1.39)   | 0.216   | 0.63(0.11, 3.55)   | 0.605   | 0.92(0.22, 3.77)   | 0.909   |
| P for trend                  |                    | 0.191   |                    | 0.610   |                    | 0.769   |

**Table 4. The odds ratio (OR) of BMI, WHR, WHtR, and BAI in the univariate logistic regression model.** Footnotes: DR, DME and VTDR were set as outcomes of the regression model, respectively.

|                              | Binary regression model of DR |         | Ordinal regression model of DR |         | Binary regression model of DME |         | Binary regression model of VTDR |         |
|------------------------------|-------------------------------|---------|--------------------------------|---------|--------------------------------|---------|---------------------------------|---------|
|                              | OR (95%CI)                    | P valve | OR (95%CI)                     | P valve | OR (95%CI)                     | P valve | Odds ratio (95%CI)              | P valve |
| <b>BMI, kg/m<sup>2</sup></b> |                               |         |                                |         |                                |         |                                 |         |
| 18.5-22.9 (normal weight)    | Ref.                          |         | Ref.                           |         | Ref.                           |         | Ref.                            |         |
| 23.0-25.0 (overweight)       | 1.26(0.93, 1.70)              | 0.133   | 1.28(0.95, 1.72)               | 0.109   | 1.16(0.69, 1.95)               | 0.585   | 1.19(0.72, 1.97)                | 0.492   |
| ≥25.0 (obese)                | 0.90(0.68, 1.20)              | 0.479   | 0.89(0.67, 1.18)               | 0.425   | 0.69(0.40, 1.17)               | 0.164   | 0.64(0.38, 1.08)                | 0.094   |
| P for trend                  |                               | 0.381   |                                | 0.329   |                                | 0.147   |                                 | 0.083   |
| <b>WHR</b>                   |                               |         |                                |         |                                |         |                                 |         |
| Quarter 1                    | Ref.                          |         | Ref.                           |         | Ref.                           |         | Ref.                            |         |
| Quarter 2                    | 1.38(0.69, 2.76)              | 0.368   | 1.39(0.69, 2.77)               | 0.355   | 2.18(0.53, 8.93)               | 0.279   | 1.62(0.45, 5.90)                | 0.463   |
| Quarter 3                    | 0.82(0.39, 1.75)              | 0.615   | 0.85(0.40, 1.80)               | 0.669   | 0.68(0.11, 4.13)               | 0.673   | 0.76(0.17, 3.48)                | 0.727   |
| Quarter 4                    | 2.17(1.13, 4.17)              | 0.021   | 2.25(1.18, 4.32)               | 0.014   | 3.63(0.97, 13.54)              | 0.055   | 2.70(0.82, 8.87)                | 0.101   |
| P for trend                  |                               | 0.056   |                                | 0.040   |                                | 0.093   |                                 | 0.152   |
| <b>WHtR</b>                  |                               |         |                                |         |                                |         |                                 |         |
| Quarter 1                    | Ref.                          |         | Ref.                           |         | Ref.                           |         | Ref.                            |         |
| Quarter 2                    | 0.99(0.67, 1.47)              | 0.974   | 0.99(0.67, 1.46)               | 0.962   | 1.16(0.62, 2.18)               | 0.643   | 1.15(0.62, 2.14)                | 0.651   |
| Quarter 3                    | 0.85(0.57, 1.27)              | 0.430   | 0.86(0.57, 1.28)               | 0.457   | 0.79(0.39, 1.57)               | 0.494   | 0.74(0.37, 1.48)                | 0.397   |
| Quarter 4                    | 0.86(0.58, 1.29)              | 0.475   | 0.86(0.57, 1.28)               | 0.444   | 0.36(0.15, 0.86)               | 0.021   | 0.34(0.14, 0.81)                | 0.015   |
| P for trend                  |                               | 0.358   |                                | 0.344   |                                | 0.015   |                                 | 0.009   |
| <b>BAI</b>                   |                               |         |                                |         |                                |         |                                 |         |
| Quarter 1                    | Ref.                          |         | Ref.                           |         | Ref.                           |         | Ref.                            |         |
| Quarter 2                    | 0.64(0.34, 1.19)              | 0.158   | 0.61(0.33, 1.13)               | 0.117   | 0.54(0.17, 1.65)               | 0.277   | 0.48(0.16, 1.44)                | 0.191   |
| Quarter 3                    | 0.43(0.22, 0.85)              | 0.015   | 0.43(0.22, 0.84)               | 0.014   | 0.54(0.17, 1.65)               | 0.277   | 0.48(0.16, 1.44)                | 0.191   |
| Quarter 4                    | 0.50(0.26, 0.97)              | 0.039   | 0.49(0.25, 0.94)               | 0.031   | 0.21(0.04, 1.00)               | 0.05    | 0.28(0.08, 1.06)                | 0.061   |
| P for trend                  |                               | 0.017   |                                | 0.015   |                                | 0.042   |                                 | 0.051   |

1  
2  
3  
4 213 In the logistic regression model adjusted for sex and age, Q4-WHtR remained as a  
5  
6 214 protective factor of VTDR (or=0.40, [95% CI, 0.16-0.96], Supplementary Table S1),  
7  
8  
9 215 independent of lipid metabolism parameter (Supplementary Table S2). In the full model, Q2-  
10  
11 216 WHtR presented as a significant risk factor of DME (or=3.04, [95 %CI, 1.04-8.85], Table 3)  
12  
13  
14 217 and VTDR (or=2.74, [95%CI, 1.01-7.43]). The association was also more significant in female  
15  
16  
17 218 patients (for DME, p for trend =0.065, or of Q2-WHtR =6.79, [95%CI, 1.19-38.57]; for VTDR,  
18  
19 219 p for trend =0.049, or of Q2-WHtR =7.38, [95%CI, 1.48-36.77], Table S3-1), but not in male  
20  
21  
22 220 patients either (Table S3-2).

#### 221 **Association of BAI with any DR and severe DR**

222 The prevalence of DR and severe VTDR showed a downward trend with the increase of  
223 BAI (Figure 2, Table 2). However, in the univariate logistic regression model, increased BAI  
224 was associated with a decreased risk of DR (Table 4). After adjusted for sex and age, the  
225 association became less significant, while in the full model, the association with either any DR,  
226 DME or VTDR was not significant.

227

#### 228 **Discussion**

229 In this study, we enrolled 2,305 participants and analyzed the association of obesity with  
230 any DR, DME and VTDR. There are three main findings in our study. First, only 29.6% of  
231 diabetic patients had normal weight, while as high as 67.8% of diabetic patients were  
232 overweight or obese. Second, obesity (BMI>25.0kg/m<sup>2</sup>) presented as a significant protective  
233 factor of VTDR, while Q2-WHtR presented as a significant risk factor. Third, we found a  
234 significant negative association between BAI and DR in the univariate logistic regression model,

1  
2  
3  
4 235 while the association became less significant in the multivariable model.  
5

6 236 Previous studies recognized obesity as a critical component of metabolic syndrome, which  
7  
8  
9 237 induces insulin resistance and advances the development of type 2 diabetes<sup>2,3</sup>. Therefore, weight  
10  
11 238 control is usually recommended in the management of diabetes and several systemic diseases  
12  
13  
14 239 to reduce the prevalence of complications<sup>3,11,12</sup>. However, in this study, three obesity-related  
15  
16  
17 240 indexes, BMI, WHtR, and BAI, were all negatively associated with DR. The result presented  
18  
19 241 as an "obesity paradox", which was also presented in several previous studies<sup>13-15</sup>. Moreover, it  
20  
21  
22 242 was more significant in the association with VTDR. The first possible reason would be that  
23  
24  
25 243 VTDR, presented and DME or PDR, was more likely to appear in the patients with advanced  
26  
27 244 diabetes. Advanced diabetes would manifest as weight loss as one of the metabolic  
28  
29  
30 245 complications, contributing to the inverse association of obesity with DR. Second, BMI could  
31  
32 246 hardly differentiate general obesity and centripetal obesity, which may play a different role in  
33  
34  
35 247 the progress of diabetes. Third, all the participants were from the community. They were  
36  
37  
38 248 diagnosed with diabetes in the hospital before the enrollment. The patients who had severe  
39  
40  
41 249 complications, low willingness to seek doctor's help or mobility problems, would be limited,  
42  
43 250 contributing to the selection bias in the study.

44  
45 251 Although obesity was recognized as one of the important biomarkers inducing insulin  
46  
47  
48 252 resistance<sup>16</sup>, the obesity paradox has prevented scientists from making recommendations on  
49  
50  
51 253 weight management for diabetic patients. The positive correlation between centripetal obesity  
52  
53 254 (presented as higher WHR) and diabetic progression has shed light on this problem.<sup>17</sup> In study  
54  
55  
56 255 of Tien Yin Wong *et al*, WHR was regarded to assess centripetal obesity, and BAI is established  
57  
58  
59 256 and has a significant linear relationship with body fat rate.<sup>18</sup> They demonstrated that abdominal  
60

1  
2  
3  
4 257 obesity may be a more critical factor of DR than the generalized obesity. However, in our study,  
5  
6 258 as the indicator of centripetal obesity, Q2-WHtR associated positively with DR, and WHtR  
7  
8  
9 259 generally shows an opposite trend, indicating a nonlinear relationship between centripetal  
10  
11 260 obesity. Therefore, we are collecting follow-up data to further prospectively analyze the  
12  
13  
14 261 relationship between obesity and diabetic retinopathy.

15  
16  
17 262 Our study also found that the associations between obesity-related index (both BMI and  
18  
19 263 WHR) and VTDR were only significant in female patients, indicating that female patients  
20  
21  
22 264 would have a higher risk with the increase of centripetal obesity. The sex-specific obesity-  
23  
24 265 diabetes association has been reported in several studies, but the association between obesity-  
25  
26  
27 266 related indexes (including BMI, WHR, WHtR, BAI) and diabetic retinopathy was seldom  
28  
29  
30 267 reported. We furthered analyzed the sex-specific distribution regarding different obesity-related  
31  
32 268 indexes (Figure 3). Male patients have a significantly higher WHR, lower WHtR and lower  
33  
34  
35 269 BAI. However, the results may be influenced by the small number of patients in some of the  
36  
37  
38 270 categories after they were grouped by sex (there were “no observation” categories in Table S3-1  
39  
40 271 and Table S3-2). Therefore, more studies should be designed to investigate the weight control  
41  
42  
43 272 management and standard weight range regarding different sex in diabetic patients.

44  
45 273 There are some other limitations in this study. First, in order to reduce the examination  
46  
47  
48 274 time and improve the compliance of participants, the measurement of waist circumference and  
49  
50  
51 275 hip circumference was not performed on every participant, while eventually 483 patients have  
52  
53 276 undergone all the measurement including height, weight, waist circumference and hip  
54  
55  
56 277 circumference. Therefore, we are unable to put BMI, WHR, WHtR, and BAI in the full model  
57  
58 278 with 2,305 patients at the same time. Second, although we used robust regression to make the  
59  
60

1  
2  
3  
4 279 odds ratio more robust, we did not exclude the influence of collinearity in the full model, which  
5  
6 280 may contribute to the variation of the association of factors such as BAI with DR. Third, the  
7  
8  
9 281 diabetic participants with severe condition (e.g. very poor eye sight, past DR treatment history,  
10  
11 282 occurred with other combined eye diseases that could affect retinal thickness, etc.) were  
12  
13  
14 283 excluded. On contrary, the participants usually had a less severe condition, which may affect  
15  
16  
17 284 the generalizability of the results.

18  
19 285 In summary, this study provides medical data of 2,305 participants, and analyzed the  
20  
21  
22 286 relationship between obesity and DR. The results presented general obesity and centripetal  
23  
24  
25 287 obesity as a protective factor in the development of DR, which was more significant in female  
26  
27  
28 288 patients. Because the interactions between obesity and DR is not completely clear, further  
29  
30  
31 289 researches are needed to focus on the improvement of sex-specific weight management in  
32  
33 290 diabetic patients regarding different sex.  
34  
35  
36  
37  
38  
39  
40  
41  
42  
43  
44  
45  
46  
47  
48  
49  
50  
51  
52  
53  
54  
55  
56  
57  
58  
59  
60



1  
2  
3  
4 291 **Contributors**

5  
6 292 W Huang and W Wei conceived and designed the study. W Li, W Wei, X Gong, L Wang,  
7  
8  
9 293 J Meng, Y Li, and K Xiong collected and interpreted the data. W Li, W Wei and L Jin carried  
10  
11 294 out the statistical analysis. W Li wrote the manuscript. W Huang, W Wang, X Gong, and X  
12  
13  
14 295 Liang reviewed and edited the manuscript. All authors have seen the final version of the  
15  
16  
17 296 manuscript and approved it for publication.  
18  
19  
20  
21

22 298 **Role of the Funding Source**

23  
24  
25 299 This study was supported by the Guangdong Province Science & Technology Plan  
26  
27 300 (2014B020228002), National Natural Science Foundation of China (82000901, 81900866),  
28  
29  
30 301 Fundamental Research Funds of the State Key Laboratory of Ophthalmology  
31  
32 302 (303060202400362). The funding organizations had no role in the design or conduct of the  
33  
34  
35 303 study; collection, management, analysis and interpretation of the data; preparation, review or  
36  
37  
38 304 approval of the manuscript; and decision to submit the manuscript for publication.  
39  
40  
41  
42

43 306 **Declaration of Interests**

44  
45 307 The authors declare no competing financial interests.  
46  
47  
48  
49  
50

51 309 **Data availability statement**

52  
53 310 All data relevant to the study are included in the article or uploaded as supplementary  
54  
55  
56 311 information  
57  
58  
59  
60

1  
2  
3  
4 **313 Ethical Approval Statement**  
5

6 314 This study was approved by the Institutional Review Board of Zhongshan Ophthalmic  
7

8  
9 315 Center (2017KYPJ094).  
10  
11  
12  
13  
14  
15  
16  
17  
18  
19  
20  
21  
22  
23  
24  
25  
26  
27  
28  
29  
30  
31  
32  
33  
34  
35  
36  
37  
38  
39  
40  
41  
42  
43  
44  
45  
46  
47  
48  
49  
50  
51  
52  
53  
54  
55  
56  
57  
58  
59  
60

For peer review only

## References:

- 1 Ting, D. S. W., Cheung, G. C. M. & Wong, T. Y., Diabetic retinopathy: global prevalence, major risk factors, screening practices and public health challenges: a review. *Clinical & Experimental Ophthalmology* **44** 260 (2016).
- 2 Malone, J. I. & Hansen, B. C., Does obesity cause type 2 diabetes mellitus (T2DM)? Or is it the opposite? *PEDIATR DIABETES* **20** 5 (2019).
- 3 Hitman, G. A. & Finer, S., Obesity and Type 2 diabetes; achieving weight loss. *DIABETIC MED* **28** 627 (2011).
- 4 Hao, Z. *et al.*, Analysis of factors related to diabetic retinopathy in patients with newly diagnosed type 2 diabetes: a cross-sectional study. *BMJ OPEN* **10** e32095 (2020).
- 5 Zhu, W. *et al.*, Association of obesity and risk of diabetic retinopathy in diabetes patients. *MEDICINE* **97** e11807 (2018).
- 6 Madsen, L. R., Bek, T. & Richelsen, B., Diabetic retinopathy in people with Type 2 diabetes and obesity treated by Roux - en - Y gastric bypass compared with non - operated controls: with focus on the role of diabetes remission in a cross - sectional and a 6 - year follow - up study. *DIABETIC MED* (2018).
- 7 Raum, P. *et al.*, Prevalence and Cardiovascular Associations of Diabetic Retinopathy and Maculopathy: Results from the Gutenberg Health Study. *PLOS ONE* **10** e127188 (2015).
- 8 Hills, A. P. *et al.*, Epidemiology and determinants of type 2 diabetes in south Asia. *The Lancet Diabetes & Endocrinology* **6** 966 (2018).
- 9 Forthun, I. *et al.*, Maternal Prepregnancy BMI and Risk of Cerebral Palsy in Offspring. *PEDIATRICS* **138** e20160874 (2016).
- 10 Morisaki, N. *et al.*, Pre-pregnancy BMI-specific optimal gestational weight gain for women in Japan. *J EPIDEMIOL* **27** 492 (2017).
- 11 IOTF, W. I., Asia-Pacific perspective: Redefining obesity and its treatment. (2000).
- 12 ESC Guidelines on diabetes, pre-diabetes, and cardiovascular diseases developed in collaboration with the EASD. *EUR HEART J* **34** 3035 (2013).
- 13 Smith, J. J., Wright, D. M., Scanlon, P. & Lois, N., Risk factors associated with progression to referable retinopathy: a type 2 diabetes mellitus cohort study in the Republic of Ireland. *DIABETIC MED* (2020).
- 14 Li, Y. H., Sheu, W. H. & Lee, I. T., Influence of Diabetic Retinopathy on the Relationship Between Body Mass Index and Mortality in Patients with Poorly Controlled Type 2 Diabetes. *Diabetes Metab Syndr Obes* **13** 907 (2020).
- 15 Al Rubeaan, K. *et al.*, Diabetic retinopathy and its risk factors in a society with a type 2 diabetes epidemic: a Saudi National Diabetes Registry - based study. *ACTA OPHTHALMOL* **93** e140 (2015).
- 16 Arkan, M. C. *et al.*, IKK-beta links inflammation to obesity-induced insulin resistance. *NAT MED* **11** 191 (2005).
- 17 Man, R. E. K. *et al.*, Differential Association of Generalized and Abdominal Obesity With Diabetic Retinopathy in Asian Patients With Type 2 Diabetes. *JAMA OPHTHALMOL* **134** 251 (2016).
- 18 Bergman, R. N. *et al.*, A Better Index of Body Adiposity. *OBESITY* **19** 1083 (2011).

1  
2  
3 **Figure Legend**  
4  
5  
6

7 **Figure 1. International Clinical Severity Scale of Diabetic Retinopathy and Diabetic**  
8 **Macular Edema.** Footnotes: DR: diabetic retinopathy; NPDR: non-proliferative diabetic  
9 retinopathy; PDR: proliferative diabetic retinopathy; IRMA: intraretinal microvascular  
10 abnormalities; DME: diabetic macular edema.  
11  
12  
13  
14

15  
16 **Figure 2. The prevalence of diabetic retinopathy (DR) and severe DR (diabetic**  
17 **retinopathy, DME, and vision threatening diabetic retinopathy, VTDR) in different**  
18 **groups of the obesity-related indexes.** Footnotes: BMI: Body mass index. WHR: Waist to  
19 hip ratio. WHtR: waist to height ratio. BAI: Body adiposity index.  
20  
21  
22  
23  
24  
25

26 **Figure 3. The number of male and female patients in different groups of the obesity-**  
27 **related indexes**  
28  
29  
30  
31  
32  
33  
34  
35  
36  
37  
38  
39  
40  
41  
42  
43  
44  
45  
46  
47  
48  
49  
50  
51  
52  
53  
54  
55  
56  
57  
58  
59  
60

| Severity level       | Findings after pupil dilation                                                                                                                                                                                                                                                                                                                                                                                                                           | Any DR | DME | VTDR |
|----------------------|---------------------------------------------------------------------------------------------------------------------------------------------------------------------------------------------------------------------------------------------------------------------------------------------------------------------------------------------------------------------------------------------------------------------------------------------------------|--------|-----|------|
| <b>DR scale</b>      |                                                                                                                                                                                                                                                                                                                                                                                                                                                         |        |     |      |
| <b>No DR</b>         | No abnormalities                                                                                                                                                                                                                                                                                                                                                                                                                                        |        |     |      |
| <b>Mild NPDR</b>     | Microaneurysms only                                                                                                                                                                                                                                                                                                                                                                                                                                     |        |     |      |
| <b>Moderate NPDR</b> | More than just microaneurysms but less than Severe NPDR                                                                                                                                                                                                                                                                                                                                                                                                 |        |     |      |
| <b>Severe NPDR</b>   | Any of the following:<br><ul style="list-style-type: none"> <li>• &gt;20 intraretinal hemorrhages in each of 4 quadrants;</li> <li>• Definite venous beading in 2+ quadrants;</li> <li>• Prominent IRMA in 1+ quadrant</li> </ul> And no signs of proliferative retinopathy                                                                                                                                                                             |        |     |      |
| <b>PDR</b>           | One or more of the following:<br><ul style="list-style-type: none"> <li>• Neovascularization;</li> <li>• Vitreous/preretinal hemorrhage</li> </ul>                                                                                                                                                                                                                                                                                                      |        |     |      |
| <b>DME scale</b>     |                                                                                                                                                                                                                                                                                                                                                                                                                                                         |        |     |      |
| <b>No DME</b>        | No apparent retinal thickening or hard exudates in posterior pole                                                                                                                                                                                                                                                                                                                                                                                       |        |     |      |
| <b>DME</b>           | Some retinal thickening or hard exudates in posterior pole:<br><ul style="list-style-type: none"> <li>• Mild: some retinal thickening or hard exudates in posterior pole but distant from the center of the macular;</li> <li>• Moderate: retinal thickening or hard exudates approaching the center of the macula but not involving the center;</li> <li>• Severe: Retinal thickening or hard exudates involving the center of the macular.</li> </ul> |        |     |      |

**Figure 1. International Clinical Severity Scale of Diabetic Retinopathy and Diabetic Macular Edema.** Footnotes: DR: diabetic retinopathy; NPDR: non-proliferative diabetic retinopathy; PDR: proliferative diabetic retinopathy; IRMA: intraretinal microvascular abnormalities; DME: diabetic macular edema.

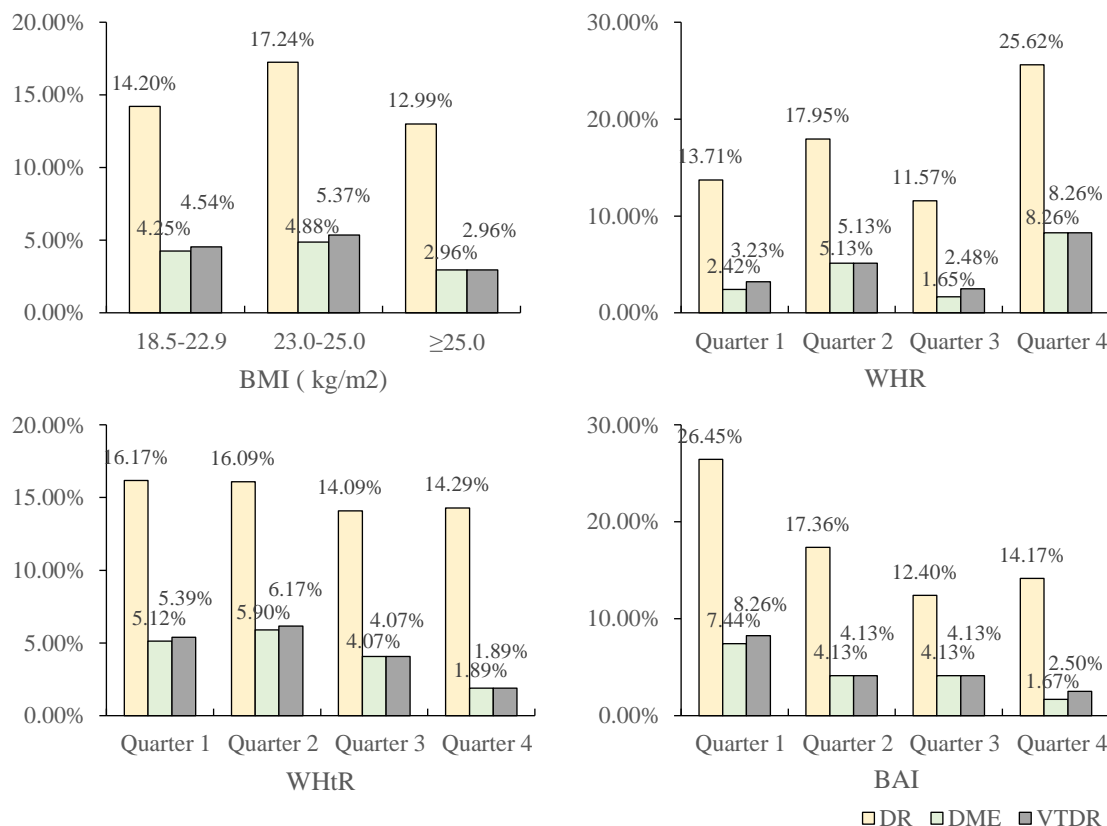

**Figure 2. The prevalence of diabetic retinopathy (DR) and severe DR (diabetic retinopathy, DME, and vision threatening diabetic retinopathy, VTDR) in different groups of the obesity-related indexes.** Footnotes: BMI: Body mass index. WHR: Waist to hip ratio. WHtR: waist to height ratio. BAI: Body adiposity index.

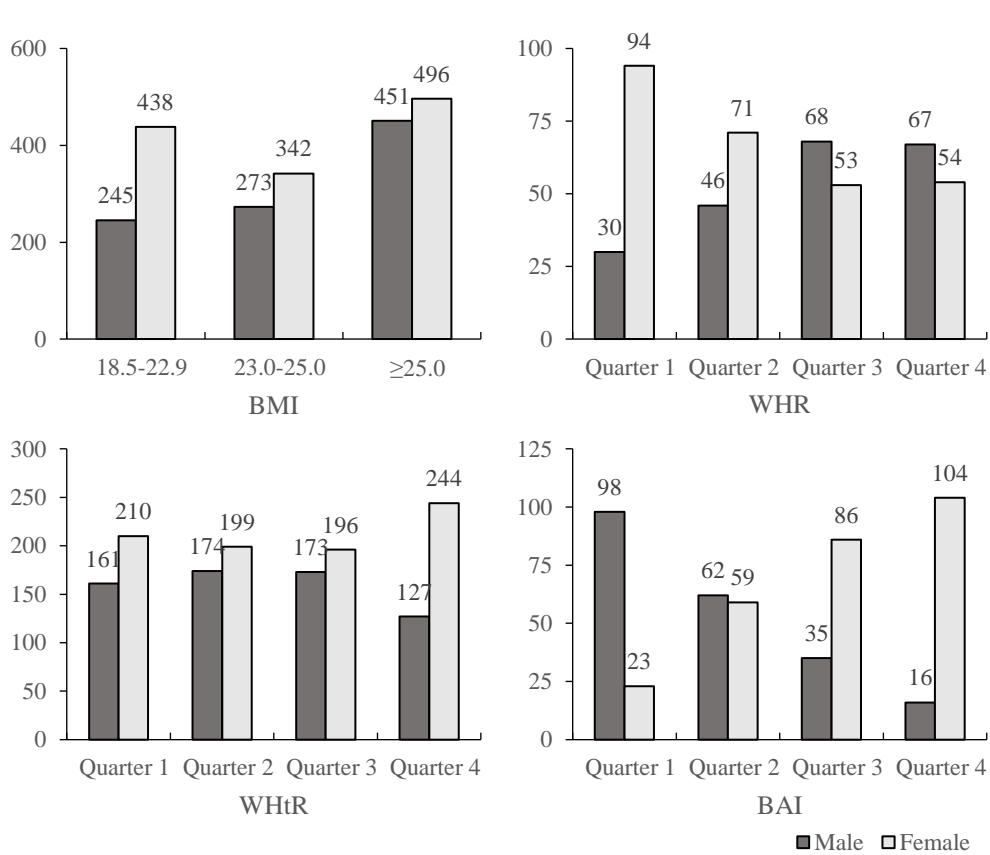

**Figure 3. The number of male and female patients in different groups of the obesity-related indexes.**

## Supplementary Materials

**Table S1 The odds ratio (OR) of Body mass index (BMI), Waist to hip ratio (WHR), waist to height ratio (WHtR), and Body adiposity index (BAI) in the binary logistic regression model adjusted for age and sex.** Footnotes: diabetic retinopathy (DR), diabetic macular edema (DME) and vision threatening diabetic retinopathy (VTDR) were set as outcomes of the regression model, respectively.

|                              | DR                  |         | DME                 |         | VTDR                |         |
|------------------------------|---------------------|---------|---------------------|---------|---------------------|---------|
|                              | Odds ratio (95% CI) | P value | Odds ratio (95% CI) | P value | Odds ratio (95% CI) | P value |
| <b>BMI, kg/m<sup>2</sup></b> |                     |         |                     |         |                     |         |
| 18.5-22.9 (normal weight)    | Ref.                |         | Ref.                |         | Ref.                |         |
| 23.0-25.0 (overweight)       | 1.22(0.90, 1.65)    | 0.200   | 1.09(0.64, 1.84)    | 0.758   | 1.12(0.67, 1.86)    | 0.660   |
| ≥25.0 (obese)                | 0.85(0.64, 1.14)    | 0.275   | 0.61(0.35, 1.04)    | 0.067   | 0.57(0.33, 0.96)    | 0.034   |
| P for trend                  |                     | 0.204   |                     | 0.056   |                     | 0.028   |
| <b>WHR</b>                   |                     |         |                     |         |                     |         |
| Quarter 1                    | Ref.                |         | Ref.                |         | Ref.                |         |
| Quarter 2                    | 1.32(0.66, 2.67)    | 0.434   | 2.18(0.52, 9.10)    | 0.283   | 1.60(0.43, 5.93)    | 0.478   |
| Quarter 3                    | 0.77(0.35, 1.67)    | 0.503   | 0.68(0.11, 4.30)    | 0.682   | 0.76(0.16, 3.59)    | 0.725   |
| Quarter 4                    | 2.02(1.03, 3.98)    | 0.041   | 3.61(0.92, 14.16)   | 0.065   | 2.65(0.77, 9.12)    | 0.123   |
| P for trend                  |                     | 0.089   |                     | 0.101   |                     | 0.169   |
| <b>WHtR</b>                  |                     |         |                     |         |                     |         |
| Quarter 1                    | Ref.                |         | Ref.                |         | Ref.                |         |
| Quarter 2                    | 1.00(0.68, 1.48)    | 0.991   | 1.21(0.64, 2.28)    | 0.558   | 1.20(0.64, 2.23)    | 0.567   |
| Quarter 3                    | 0.87(0.58, 1.30)    | 0.495   | 0.84(0.42, 1.68)    | 0.620   | 0.79(0.40, 1.58)    | 0.509   |
| Quarter 4                    | 0.95(0.63, 1.42)    | 0.785   | 0.42(0.17, 1.02)    | 0.055   | 0.40(0.16, 0.96)    | 0.039   |
| P for trend                  |                     | 0.627   |                     | 0.046   |                     | 0.029   |
| <b>BAI</b>                   |                     |         |                     |         |                     |         |
| Quarter 1                    | Ref.                |         | Ref.                |         | Ref.                |         |
| Quarter 2                    | 0.64(0.34, 1.23)    | 0.182   | 0.57(0.18, 1.84)    | 0.344   | 0.51(0.16, 1.60)    | 0.247   |
| Quarter 3                    | 0.44(0.21, 0.93)    | 0.031   | 0.62(0.18, 2.18)    | 0.456   | 0.55(0.16, 1.90)    | 0.348   |
| Quarter 4                    | 0.52(0.24, 1.13)    | 0.098   | 0.27(0.05, 1.56)    | 0.144   | 0.37(0.08, 1.69)    | 0.199   |
| P for trend                  |                     | 0.060   |                     | 0.166   |                     | 0.201   |



**Table S2 The OR of BMI, WHR, WHtR, and BAI in the binary logistic regression model adjusted for age, sex, and lipid metabolism parameter (total cholesterol, triglycerides, low-density cholesterol, and high-density cholesterol).** Footnotes: DR, DME and VTDR were set as outcomes of the regression model, respectively.

|                           | DR                  |         | DME                 |         | VTDR                |         |
|---------------------------|---------------------|---------|---------------------|---------|---------------------|---------|
|                           | Odds ratio (95% CI) | P value | Odds ratio (95% CI) | P value | Odds ratio (95% CI) | P value |
| <b>BMI, kg/m2</b>         |                     |         |                     |         |                     |         |
| 18.5-22.9 (normal weight) | Ref.                |         | Ref.                |         | Ref.                |         |
| 23.0-25.0 (overweight)    | 1.24(0.91, 1.68)    | 0.175   | 1.10(0.64, 1.88)    | 0.729   | 1.13(0.67, 1.89)    | 0.649   |
| ≥25.0 (obese)             | 0.87(0.64, 1.17)    | 0.343   | 0.61(0.35, 1.06)    | 0.079   | 0.56(0.33, 0.97)    | 0.039   |
| P for trend               |                     | 0.251   |                     | 0.065   |                     | 0.030   |
| <b>WHR</b>                |                     |         |                     |         |                     |         |
| Quarter 1                 | Ref.                |         | Ref.                |         | Ref.                |         |
| Quarter 2                 | 1.37(0.67, 2.78)    | 0.387   | 2.38(0.56, 10.10)   | 0.241   | 1.68(0.45, 6.35)    | 0.441   |
| Quarter 3                 | 0.81(0.36, 1.80)    | 0.604   | 0.78(0.12, 5.15)    | 0.795   | 0.79(0.16, 3.95)    | 0.776   |
| Quarter 4                 | 2.22(1.08, 4.55)    | 0.030   | 4.37(1.02, 18.80)   | 0.048   | 2.85(0.76, 10.69)   | 0.121   |
| P for trend               |                     | 0.066   |                     | 0.074   |                     | 0.165   |
| <b>WHtR</b>               |                     |         |                     |         |                     |         |
| Quarter 1                 | Ref.                |         | Ref.                |         | Ref.                |         |
| Quarter 2                 | 0.97(0.65, 1.45)    | 0.874   | 1.26(0.65, 2.43)    | 0.492   | 1.22(0.64, 2.32)    | 0.537   |
| Quarter 3                 | 0.84(0.55, 1.28)    | 0.413   | 0.88(0.42, 1.81)    | 0.720   | 0.81(0.39, 1.65)    | 0.559   |
| Quarter 4                 | 0.90(0.59, 1.38)    | 0.639   | 0.43(0.17, 1.08)    | 0.072   | 0.40(0.16, 0.98)    | 0.046   |
| P for trend               |                     | 0.511   |                     | 0.060   |                     | 0.033   |
| <b>BAI</b>                |                     |         |                     |         |                     |         |
| Quarter 1                 | Ref.                | Ref.    | Ref.                |         | Ref.                |         |
| Quarter 2                 | 0.64(0.33, 1.23)    | 0.177   | 0.60(0.18, 1.96)    | 0.396   | 0.53(0.17, 1.72)    | 0.293   |
| Quarter 3                 | 0.43(0.20, 0.92)    | 0.030   | 0.64(0.18, 2.27)    | 0.486   | 0.55(0.16, 1.91)    | 0.348   |
| Quarter 4                 | 0.51(0.23, 1.12)    | 0.095   | 0.28(0.05, 1.65)    | 0.161   | 0.37(0.08, 1.72)    | 0.202   |
| P for trend               |                     | 0.059   |                     | 0.186   |                     | 0.200   |

**Table S3-1 The OR of BMI, WHR, WHtR, and BAI in the binary logistic regression model additionally adjusted for variables in female patients.**

Footnotes: These variables included continuous variables (e.g., age, systolic blood pressure, HbA1c, c-reaction protein, total cholesterol, triglycerides, low-density cholesterol, high-density cholesterol, creatinine, microalbuminuria, uric acid, and axial length) and categorical variables (e.g., sex, smoking history, drinking history, education, duration of diabetes, and insulin use). DR, DME and VTDR were set as outcomes of the regression model, respectively. DR, DME and VTDR were set as outcomes of the regression model, respectively.

|                              | DR<br>Odds ratio (95%CI) | P value | DME<br>Odds ratio (95%CI) | P value | VTDR<br>Odds ratio (95%CI) | P value |
|------------------------------|--------------------------|---------|---------------------------|---------|----------------------------|---------|
| <b>BMI, kg/m<sup>2</sup></b> |                          |         |                           |         |                            |         |
| 18.5-22.9 (normal weight)    | Ref.                     |         | Ref.                      |         | Ref.                       |         |
| 23.0-25.0 (overweight)       | 0.89(0.49, 1.62)         | 0.708   | 0.68(0.17, 2.68)          | 0.582   | 0.57(0.15, 2.17)           | 0.412   |
| ≥25.0 (obese)                | 0.77(0.43, 1.39)         | 0.392   | 0.10(0.01, 0.77)          | 0.027   | 0.09(0.01, 0.76)           | 0.027   |
| P for trend                  |                          | 0.392   |                           | 0.021   |                            | 0.015   |
| <b>WHR</b>                   |                          |         |                           |         |                            |         |
| Quarter 1                    | Ref.                     |         | Ref.                      |         | Ref.                       |         |
| Quarter 2                    | 1.31(0.46, 3.75)         | 0.610   | 1.42(0.02, 81.66)         | 0.866   | 0.78(0.02, 29.41)          | 0.894   |
| Quarter 3                    | 0.25(0.04, 1.34)         | 0.106   | *                         | *       | *                          | *       |
| Quarter 4                    | 1.20(0.40, 3.55)         | 0.748   | 3.52(0.20, 61.43)         | 0.389   | 2.21(0.26, 18.92)          | 0.470   |
| P for trend                  |                          | 0.617   |                           | 0.459   |                            | 0.786   |
| <b>WHtR</b>                  |                          |         |                           |         |                            |         |
| Quarter 1                    | Ref.                     |         | Ref.                      |         | Ref.                       |         |
| Quarter 2                    | 1.36(0.60, 3.09)         | 0.466   | 6.79(1.19, 38.57)         | 0.031   | 7.38(1.48, 36.77)          | 0.015   |
| Quarter 3                    | 0.70(0.30, 1.67)         | 0.421   | *                         | *       | *                          | *       |
| Quarter 4                    | 1.10(0.47, 2.56)         | 0.828   | 0.41(0.06, 2.63)          | 0.347   | 0.40(0.06, 2.73)           | 0.351   |
| P for trend                  |                          | 0.884   |                           | 0.065   |                            | 0.049   |
| <b>BAI</b>                   |                          |         |                           |         |                            |         |
| Quarter 1                    | Ref.                     |         | Ref.                      |         | Ref.                       |         |
| Quarter 2                    | 1.11(0.26, 4.78)         | 0.889   | 0.31(0.01, 12.27)         | 0.534   | 0.30(0.01, 8.98)           | 0.487   |
| Quarter 3                    | 0.66(0.15, 2.93)         | 0.582   | 0.83(0.04, 15.46)         | 0.898   | 0.80(0.11, 5.86)           | 0.822   |
| Quarter 4                    | 0.73(0.17, 3.11)         | 0.673   | 0.26(0.01, 6.94)          | 0.425   | 0.76(0.14, 4.26)           | 0.758   |
| P for trend                  |                          | 0.512   |                           | 0.653   |                            | 0.857   |

\* No observation.

**Table S3-2 The OR of BMI, WHR, WHtR, and BAI in the binary logistic regression model additionally adjusted for variables in male patients.**

|                           | DR                 |         | DME                |         | VTDR               |         |
|---------------------------|--------------------|---------|--------------------|---------|--------------------|---------|
|                           | Odds ratio (95%CI) | P valve | Odds ratio (95%CI) | P valve | Odds ratio (95%CI) | P valve |
| <b>BMI, kg/m2</b>         |                    |         |                    |         |                    |         |
| 18.5-22.9 (normal weight) | Ref.               |         | Ref.               |         | Ref.               |         |
| 23.0-25.0 (overweight)    | 0.61(0.29, 1.27)   | 0.182   | 1.63(0.46, 5.74)   | 0.448   | 1.84(0.54, 6.22)   | 0.328   |
| ≥25.0 (obese)             | 0.59(0.29, 1.19)   | 0.144   | 0.73(0.23, 2.38)   | 0.605   | 0.71(0.22, 2.27)   | 0.565   |
| P for trend               |                    | 0.183   |                    | 0.411   |                    | 0.326   |
| <b>WHR</b>                |                    |         |                    |         |                    |         |
| Quarter 1                 | Ref.               |         | *                  | *       | *                  | *       |
| Quarter 2                 | 0.64(0.12, 3.39)   | 0.602   | Ref.               |         | Ref.               |         |
| Quarter 3                 | 0.61(0.14, 2.73)   | 0.514   | 0.40(0.06, 2.78)   | 0.354   | 0.53(0.09, 3.02)   | 0.472   |
| Quarter 4                 | 1.07(0.27, 4.29)   | 0.919   | 1.35(0.18, 9.92)   | 0.771   | 1.55(0.21, 11.45)  | 0.669   |
| P for trend               |                    | 0.777   |                    | 0.190   |                    | 0.136   |
| <b>WHtR</b>               |                    |         |                    |         |                    |         |
| Quarter 1                 | Ref.               |         | Ref.               |         | Ref.               |         |
| Quarter 2                 | 0.75(0.33, 1.70)   | 0.494   | 1.85(0.53, 6.52)   | 0.337   | 1.43(0.44, 4.66)   | 0.557   |
| Quarter 3                 | 0.48(0.19, 1.18)   | 0.109   | 1.39(0.35, 5.56)   | 0.643   | 1.06(0.29, 3.88)   | 0.927   |
| Quarter 4                 | 0.56(0.21, 1.50)   | 0.248   | 0.68(0.09, 5.40)   | 0.718   | 0.57(0.07, 4.64)   | 0.601   |
| P for trend               |                    | 0.124   |                    | 0.714   |                    | 0.567   |
| <b>BAI</b>                |                    |         |                    |         |                    |         |
| Quarter 1                 | Ref.               |         | Ref.               |         | Ref.               |         |
| Quarter 2                 | 0.57(0.19, 1.75)   | 0.327   | 1.61(0.36, 7.12)   | 0.530   | 1.55(0.38, 6.33)   | 0.544   |
| Quarter 3                 | 0.60(0.22, 1.67)   | 0.330   | 0.41(0.04, 3.90)   | 0.438   | 0.35(0.04, 3.04)   | 0.339   |
| Quarter 4                 | 0.46(0.08, 2.80)   | 0.403   | *                  | *       | *                  | *       |
| P for trend               |                    | 0.243   |                    | 0.464   |                    | 0.399   |

\* No observation.

## STROBE Statement—checklist of items that should be included in reports of observational studies

| Section/item                 | Item No | Recommendation                                                                                                                                                                                                                                                                                                                                                                                                                                                         | Reported on Page Number/Line Number | Reported on Section/Paragraph |
|------------------------------|---------|------------------------------------------------------------------------------------------------------------------------------------------------------------------------------------------------------------------------------------------------------------------------------------------------------------------------------------------------------------------------------------------------------------------------------------------------------------------------|-------------------------------------|-------------------------------|
| Title and abstract           | 1       | (a) Indicate the study's design with a commonly used term in the title or the abstract                                                                                                                                                                                                                                                                                                                                                                                 |                                     |                               |
|                              |         | (b) Provide in the abstract an informative and balanced summary of what was done and what was found                                                                                                                                                                                                                                                                                                                                                                    |                                     |                               |
| <b>Introduction</b>          |         |                                                                                                                                                                                                                                                                                                                                                                                                                                                                        |                                     |                               |
| Background/<br>rationale     | 2       | Explain the scientific background and rationale for the investigation being reported                                                                                                                                                                                                                                                                                                                                                                                   |                                     |                               |
| Objectives                   | 3       | State specific objectives, including any prespecified hypotheses                                                                                                                                                                                                                                                                                                                                                                                                       |                                     |                               |
| <b>Methods</b>               |         |                                                                                                                                                                                                                                                                                                                                                                                                                                                                        |                                     |                               |
| Study design                 | 4       | Present key elements of study design early in the paper                                                                                                                                                                                                                                                                                                                                                                                                                |                                     |                               |
| Setting                      | 5       | Describe the setting, locations, and relevant dates, including periods of recruitment, exposure, follow-up, and data collection                                                                                                                                                                                                                                                                                                                                        |                                     |                               |
| Participants                 | 6       | (a) <b>Cohort study</b> —Give the eligibility criteria, and the sources and methods of selection of participants. Describe methods of follow-up<br><b>Case-control study</b> —Give the eligibility criteria, and the sources and methods of case ascertainment and control selection. Give the rationale for the choice of cases and controls<br><b>Cross-sectional study</b> —Give the eligibility criteria, and the sources and methods of selection of participants |                                     |                               |
|                              |         | (b) <b>Cohort study</b> —For matched studies, give matching criteria and number of exposed and unexposed<br><b>Case-control study</b> —For matched studies, give matching criteria and the number of controls per case                                                                                                                                                                                                                                                 |                                     |                               |
| Variables                    | 7       | Clearly define all outcomes, exposures, predictors, potential confounders, and effect modifiers. Give diagnostic criteria, if applicable                                                                                                                                                                                                                                                                                                                               |                                     |                               |
| Data sources/<br>measurement | 8*      | For each variable of interest, give sources of data and details of methods of assessment (measurement). Describe comparability of assessment methods if there is more than one group                                                                                                                                                                                                                                                                                   |                                     |                               |
| Bias                         | 9       | Describe any efforts to address potential sources of bias                                                                                                                                                                                                                                                                                                                                                                                                              |                                     |                               |
| Study size                   | 10      | Explain how the study size was arrived at                                                                                                                                                                                                                                                                                                                                                                                                                              |                                     |                               |
| Quantitative variables       | 11      | Explain how quantitative variables were handled in the analyses. If applicable, describe which groupings were chosen and why                                                                                                                                                                                                                                                                                                                                           |                                     |                               |

|                     |     |                                                                                                                                                                                                                                                                                                           |  |  |
|---------------------|-----|-----------------------------------------------------------------------------------------------------------------------------------------------------------------------------------------------------------------------------------------------------------------------------------------------------------|--|--|
| Statistical methods | 12  | (a) Describe all statistical methods, including those used to control for confounding                                                                                                                                                                                                                     |  |  |
|                     |     | (b) Describe any methods used to examine subgroups and interactions                                                                                                                                                                                                                                       |  |  |
|                     |     | (c) Explain how missing data were addressed                                                                                                                                                                                                                                                               |  |  |
|                     |     | (d) <b>Cohort study</b> —If applicable, explain how loss to follow-up was addressed<br><b>Case-control study</b> —If applicable, explain how matching of cases and controls was addressed<br><b>Cross-sectional study</b> —If applicable, describe analytical methods taking account of sampling strategy |  |  |
|                     |     | (e) Describe any sensitivity analyses                                                                                                                                                                                                                                                                     |  |  |
| <b>Results</b>      |     |                                                                                                                                                                                                                                                                                                           |  |  |
| Participants        | 13* | (a) Report numbers of individuals at each stage of study—eg numbers potentially eligible, examined for eligibility, confirmed eligible, included in the study, completing follow-up, and analysed                                                                                                         |  |  |
|                     |     | (b) Give reasons for non-participation at each stage                                                                                                                                                                                                                                                      |  |  |
|                     |     | (c) Consider use of a flow diagram                                                                                                                                                                                                                                                                        |  |  |
| Descriptive data    | 14* | (a) Give characteristics of study participants (eg demographic, clinical, social) and information on exposures and potential confounders                                                                                                                                                                  |  |  |
|                     |     | (b) Indicate number of participants with missing data for each variable of interest                                                                                                                                                                                                                       |  |  |
|                     |     | (c) <b>Cohort study</b> —Summarise follow-up time (eg, average and total amount)                                                                                                                                                                                                                          |  |  |
| Outcome data        | 15* | <b>Cohort study</b> —Report numbers of outcome events or summary measures over time                                                                                                                                                                                                                       |  |  |
|                     |     | <b>Case-control study</b> —Report numbers in each exposure category, or summary measures of exposure                                                                                                                                                                                                      |  |  |
|                     |     | <b>Cross-sectional study</b> —Report numbers of outcome events or summary measures                                                                                                                                                                                                                        |  |  |
| Main results        | 16  | (a) Give unadjusted estimates and, if applicable, confounder-adjusted estimates and their precision (eg, 95% confidence interval). Make clear which confounders were adjusted for and why they were included                                                                                              |  |  |
|                     |     | (b) Report category boundaries when continuous variables were categorized                                                                                                                                                                                                                                 |  |  |
|                     |     | (c) If relevant, consider translating estimates of relative risk into absolute risk for a meaningful time period                                                                                                                                                                                          |  |  |
| Other analyses      | 17  | Report other analyses done—eg analyses of subgroups and interactions, and sensitivity analyses                                                                                                                                                                                                            |  |  |
| <b>Discussion</b>   |     |                                                                                                                                                                                                                                                                                                           |  |  |
| Key results         | 18  | Summarise key results with reference to study objectives                                                                                                                                                                                                                                                  |  |  |
| Limitations         | 19  | Discuss limitations of the study, taking into account sources of potential bias or imprecision. Discuss both direction and magnitude of any potential bias                                                                                                                                                |  |  |

|                          |    |                                                                                                                                                                            |   |   |   |   |   |   |
|--------------------------|----|----------------------------------------------------------------------------------------------------------------------------------------------------------------------------|---|---|---|---|---|---|
| 1                        | 2  | 3                                                                                                                                                                          | 4 | 5 | 6 | 7 | 8 | 9 |
| Interpretation           | 20 | Give a cautious overall interpretation of results considering objectives, limitations, multiplicity of analyses, results from similar studies, and other relevant evidence |   |   |   |   |   |   |
| Generalisability         | 21 | Discuss the generalisability (external validity) of the study results                                                                                                      |   |   |   |   |   |   |
| <b>Other information</b> |    |                                                                                                                                                                            |   |   |   |   |   |   |
| Funding                  | 22 | Give the source of funding and the role of the funders for the present study and, if applicable, for the original study on which the present article is based              |   |   |   |   |   |   |

\*Give information separately for cases and controls in case-control studies and, if applicable, for exposed and unexposed groups in cohort and cross-sectional studies.

**Note:** An Explanation and Elaboration article discusses each checklist item and gives methodological background and published examples of transparent reporting. The STROBE checklist is best used in conjunction with this article (freely available on the Web sites of PLoS Medicine at <http://www.plosmedicine.org/>, Annals of Internal Medicine at <http://www.annals.org/>, and Epidemiology at <http://www.epidem.com/>). Information on the STROBE Initiative is available at [www.strobe-statement.org](http://www.strobe-statement.org).
