# Supplementary material for: Association of different kinds of obesity with diabetic retinopathy in patients with type 2 diabetes
Source: HighWire-hosted journal article supplement (doi:10.1136/bmjopen-2021-056332), 2022-05-01
Supplement: bmjopen-2021-056332supp001_data_supplement.pdf [file bmjopen-2021-056332supp001_data_supplement.pdf]

## Supplementary Materials

**Table S1 The odds ratio (OR) of Body mass index (BMI), Waist to hip ratio (WHR), waist to height ratio (WHtR), and Body adiposity index (BAI) in the binary logistic regression model adjusted for age and sex.** Footnotes: diabetic retinopathy (DR), diabetic macular edema (DME) and vision threatening diabetic retinopathy (VTDR) were set as outcomes of the regression model, respectively.

|                              | DR<br>Odds ratio (95%CI) | P valve | DME<br>Odds ratio (95%CI) | P valve | VTDR<br>Odds ratio (95%CI) | P valve |
|------------------------------|--------------------------|---------|---------------------------|---------|----------------------------|---------|
| <b>BMI, kg/m<sup>2</sup></b> |                          |         |                           |         |                            |         |
| 18.5-22.9 (normal weight)    | Ref.                     |         | Ref.                      |         | Ref.                       |         |
| 23.0-25.0 (overweight)       | 1.22(0.90, 1.65)         | 0.200   | 1.09(0.64, 1.84)          | 0.758   | 1.12(0.67, 1.86)           | 0.660   |
| ≥25.0 (obese)                | 0.85(0.64, 1.14)         | 0.275   | 0.61(0.35, 1.04)          | 0.067   | 0.57(0.33, 0.96)           | 0.034   |
| P for trend                  |                          | 0.204   |                           | 0.056   |                            | 0.028   |
| <b>WHR</b>                   |                          |         |                           |         |                            |         |
| Quarter 1                    | Ref.                     |         | Ref.                      |         | Ref.                       |         |
| Quarter 2                    | 1.32(0.66, 2.67)         | 0.434   | 2.18(0.52, 9.10)          | 0.283   | 1.60(0.43, 5.93)           | 0.478   |
| Quarter 3                    | 0.77(0.35, 1.67)         | 0.503   | 0.68(0.11, 4.30)          | 0.682   | 0.76(0.16, 3.59)           | 0.725   |
| Quarter 4                    | 2.02(1.03, 3.98)         | 0.041   | 3.61(0.92, 14.16)         | 0.065   | 2.65(0.77, 9.12)           | 0.123   |
| P for trend                  |                          | 0.089   |                           | 0.101   |                            | 0.169   |
| <b>WHtR</b>                  |                          |         |                           |         |                            |         |
| Quarter 1                    | Ref.                     |         | Ref.                      |         | Ref.                       |         |
| Quarter 2                    | 1.00(0.68, 1.48)         | 0.991   | 1.21(0.64, 2.28)          | 0.558   | 1.20(0.64, 2.23)           | 0.567   |
| Quarter 3                    | 0.87(0.58, 1.30)         | 0.495   | 0.84(0.42, 1.68)          | 0.620   | 0.79(0.40, 1.58)           | 0.509   |
| Quarter 4                    | 0.95(0.63, 1.42)         | 0.785   | 0.42(0.17, 1.02)          | 0.055   | 0.40(0.16, 0.96)           | 0.039   |
| P for trend                  |                          | 0.627   |                           | 0.046   |                            | 0.029   |
| <b>BAI</b>                   |                          |         |                           |         |                            |         |
| Quarter 1                    | Ref.                     |         | Ref.                      |         | Ref.                       |         |
| Quarter 2                    | 0.64(0.34, 1.23)         | 0.182   | 0.57(0.18, 1.84)          | 0.344   | 0.51(0.16, 1.60)           | 0.247   |
| Quarter 3                    | 0.44(0.21, 0.93)         | 0.031   | 0.62(0.18, 2.18)          | 0.456   | 0.55(0.16, 1.90)           | 0.348   |
| Quarter 4                    | 0.52(0.24, 1.13)         | 0.098   | 0.27(0.05, 1.56)          | 0.144   | 0.37(0.08, 1.69)           | 0.199   |
| P for trend                  |                          | 0.060   |                           | 0.166   |                            | 0.201   |

**Table S2 The OR of BMI, WHR, WHtR, and BAI in the binary logistic regression model adjusted for age, sex, and lipid metabolism parameter (total cholesterol, triglycerides, low-density cholesterol, and high-density cholesterol).** Footnotes: DR, DME and VTDR were set as outcomes of the regression model, respectively.

|                              | DR                 | P value | DME                | P value | VTDR               | P value |
|------------------------------|--------------------|---------|--------------------|---------|--------------------|---------|
|                              | Odds ratio (95%CI) |         | Odds ratio (95%CI) |         | Odds ratio (95%CI) |         |
| <b>BMI, kg/m<sup>2</sup></b> |                    |         |                    |         |                    |         |
| 18.5-22.9 (normal weight)    | Ref.               |         | Ref.               |         | Ref.               |         |
| 23.0-25.0 (overweight)       | 1.24(0.91, 1.68)   | 0.175   | 1.10(0.64, 1.88)   | 0.729   | 1.13(0.67, 1.89)   | 0.649   |
| ≥25.0 (obese)                | 0.87(0.64, 1.17)   | 0.343   | 0.61(0.35, 1.06)   | 0.079   | 0.56(0.33, 0.97)   | 0.039   |
| P for trend                  |                    | 0.251   |                    | 0.065   |                    | 0.030   |
| <b>WHR</b>                   |                    |         |                    |         |                    |         |
| Quarter 1                    | Ref.               |         | Ref.               |         | Ref.               |         |
| Quarter 2                    | 1.37(0.67, 2.78)   | 0.387   | 2.38(0.56, 10.10)  | 0.241   | 1.68(0.45, 6.35)   | 0.441   |
| Quarter 3                    | 0.81(0.36, 1.80)   | 0.604   | 0.78(0.12, 5.15)   | 0.795   | 0.79(0.16, 3.95)   | 0.776   |
| Quarter 4                    | 2.22(1.08, 4.55)   | 0.030   | 4.37(1.02, 18.80)  | 0.048   | 2.85(0.76, 10.69)  | 0.121   |
| P for trend                  |                    | 0.066   |                    | 0.074   |                    | 0.165   |
| <b>WHtR</b>                  |                    |         |                    |         |                    |         |
| Quarter 1                    | Ref.               |         | Ref.               |         | Ref.               |         |
| Quarter 2                    | 0.97(0.65, 1.45)   | 0.874   | 1.26(0.65, 2.43)   | 0.492   | 1.22(0.64, 2.32)   | 0.537   |
| Quarter 3                    | 0.84(0.55, 1.28)   | 0.413   | 0.88(0.42, 1.81)   | 0.720   | 0.81(0.39, 1.65)   | 0.559   |
| Quarter 4                    | 0.90(0.59, 1.38)   | 0.639   | 0.43(0.17, 1.08)   | 0.072   | 0.40(0.16, 0.98)   | 0.046   |
| P for trend                  |                    | 0.511   |                    | 0.060   |                    | 0.033   |
| <b>BAI</b>                   |                    |         |                    |         |                    |         |
| Quarter 1                    | Ref.               | Ref.    | Ref.               |         | Ref.               |         |
| Quarter 2                    | 0.64(0.33, 1.23)   | 0.177   | 0.60(0.18, 1.96)   | 0.396   | 0.53(0.17, 1.72)   | 0.293   |
| Quarter 3                    | 0.43(0.20, 0.92)   | 0.030   | 0.64(0.18, 2.27)   | 0.486   | 0.55(0.16, 1.91)   | 0.348   |
| Quarter 4                    | 0.51(0.23, 1.12)   | 0.095   | 0.28(0.05, 1.65)   | 0.161   | 0.37(0.08, 1.72)   | 0.202   |
| P for trend                  |                    | 0.059   |                    | 0.186   |                    | 0.200   |

**Table S3-1 The OR of BMI, WHR, WHtR, and BAI in the binary logistic regression model additionally adjusted for variables in female patients.**

Footnotes: These variables included continuous variables (e.g., age, systolic blood pressure, HbA1c, c-reaction protein, total cholesterol, triglycerides, low-density cholesterol, high-density cholesterol, creatinine, microalbuminuria, uric acid, and axial length) and categorical variables (e.g., sex, smoking history, drinking history, education, duration of diabetes, and insulin use). DR, DME and VTDR were set as outcomes of the regression model, respectively. DR, DME and VTDR were set as outcomes of the regression model, respectively.

|                              | DR<br>Odds ratio (95%CI) | P value | DME<br>Odds ratio (95%CI) | P value | VTDR<br>Odds ratio (95%CI) | P value |
|------------------------------|--------------------------|---------|---------------------------|---------|----------------------------|---------|
| <b>BMI, kg/m<sup>2</sup></b> |                          |         |                           |         |                            |         |
| 18.5-22.9 (normal weight)    | Ref.                     |         | Ref.                      |         | Ref.                       |         |
| 23.0-25.0 (overweight)       | 0.89(0.49, 1.62)         | 0.708   | 0.68(0.17, 2.68)          | 0.582   | 0.57(0.15, 2.17)           | 0.412   |
| ≥25.0 (obese)                | 0.77(0.43, 1.39)         | 0.392   | 0.10(0.01, 0.77)          | 0.027   | 0.09(0.01, 0.76)           | 0.027   |
| P for trend                  |                          | 0.392   |                           | 0.021   |                            | 0.015   |
| <b>WHR</b>                   |                          |         |                           |         |                            |         |
| Quarter 1                    | Ref.                     |         | Ref.                      |         | Ref.                       |         |
| Quarter 2                    | 1.31(0.46, 3.75)         | 0.610   | 1.42(0.02, 81.66)         | 0.866   | 0.78(0.02, 29.41)          | 0.894   |
| Quarter 3                    | 0.25(0.04, 1.34)         | 0.106   | *                         | *       | *                          | *       |
| Quarter 4                    | 1.20(0.40, 3.55)         | 0.748   | 3.52(0.20, 61.43)         | 0.389   | 2.21(0.26, 18.92)          | 0.470   |
| P for trend                  |                          | 0.617   |                           | 0.459   |                            | 0.786   |
| <b>WHtR</b>                  |                          |         |                           |         |                            |         |
| Quarter 1                    | Ref.                     |         | Ref.                      |         | Ref.                       |         |
| Quarter 2                    | 1.36(0.60, 3.09)         | 0.466   | 6.79(1.19, 38.57)         | 0.031   | 7.38(1.48, 36.77)          | 0.015   |
| Quarter 3                    | 0.70(0.30, 1.67)         | 0.421   | *                         | *       | *                          | *       |
| Quarter 4                    | 1.10(0.47, 2.56)         | 0.828   | 0.41(0.06, 2.63)          | 0.347   | 0.40(0.06, 2.73)           | 0.351   |
| P for trend                  |                          | 0.884   |                           | 0.065   |                            | 0.049   |
| <b>BAI</b>                   |                          |         |                           |         |                            |         |
| Quarter 1                    | Ref.                     |         | Ref.                      |         | Ref.                       |         |
| Quarter 2                    | 1.11(0.26, 4.78)         | 0.889   | 0.31(0.01, 12.27)         | 0.534   | 0.30(0.01, 8.98)           | 0.487   |
| Quarter 3                    | 0.66(0.15, 2.93)         | 0.582   | 0.83(0.04, 15.46)         | 0.898   | 0.80(0.11, 5.86)           | 0.822   |
| Quarter 4                    | 0.73(0.17, 3.11)         | 0.673   | 0.26(0.01, 6.94)          | 0.425   | 0.76(0.14, 4.26)           | 0.758   |
| P for trend                  |                          | 0.512   |                           | 0.653   |                            | 0.857   |

\* No observation.

**Table S3-2 The OR of BMI, WHR, WHtR, and BAI in the binary logistic regression model additionally adjusted for variables in male patients.**

|                              | DR                 |         | DME                |         | VTDR               |         |
|------------------------------|--------------------|---------|--------------------|---------|--------------------|---------|
|                              | Odds ratio (95%CI) | P valve | Odds ratio (95%CI) | P valve | Odds ratio (95%CI) | P valve |
| <b>BMI, kg/m<sup>2</sup></b> |                    |         |                    |         |                    |         |
| 18.5-22.9 (normal weight)    | Ref.               |         | Ref.               |         | Ref.               |         |
| 23.0-25.0 (overweight)       | 0.61(0.29, 1.27)   | 0.182   | 1.63(0.46, 5.74)   | 0.448   | 1.84(0.54, 6.22)   | 0.328   |
| ≥25.0 (obese)                | 0.59(0.29, 1.19)   | 0.144   | 0.73(0.23, 2.38)   | 0.605   | 0.71(0.22, 2.27)   | 0.565   |
| P for trend                  |                    | 0.183   |                    | 0.411   |                    | 0.326   |
| <b>WHR</b>                   |                    |         |                    |         |                    |         |
| Quarter 1                    | Ref.               |         | *                  | *       | *                  | *       |
| Quarter 2                    | 0.64(0.12, 3.39)   | 0.602   | Ref.               |         | Ref.               |         |
| Quarter 3                    | 0.61(0.14, 2.73)   | 0.514   | 0.40(0.06, 2.78)   | 0.354   | 0.53(0.09, 3.02)   | 0.472   |
| Quarter 4                    | 1.07(0.27, 4.29)   | 0.919   | 1.35(0.18, 9.92)   | 0.771   | 1.55(0.21, 11.45)  | 0.669   |
| P for trend                  |                    | 0.777   |                    | 0.190   |                    | 0.136   |
| <b>WHtR</b>                  |                    |         |                    |         |                    |         |
| Quarter 1                    | Ref.               |         | Ref.               |         | Ref.               |         |
| Quarter 2                    | 0.75(0.33, 1.70)   | 0.494   | 1.85(0.53, 6.52)   | 0.337   | 1.43(0.44, 4.66)   | 0.557   |
| Quarter 3                    | 0.48(0.19, 1.18)   | 0.109   | 1.39(0.35, 5.56)   | 0.643   | 1.06(0.29, 3.88)   | 0.927   |
| Quarter 4                    | 0.56(0.21, 1.50)   | 0.248   | 0.68(0.09, 5.40)   | 0.718   | 0.57(0.07, 4.64)   | 0.601   |
| P for trend                  |                    | 0.124   |                    | 0.714   |                    | 0.567   |
| <b>BAI</b>                   |                    |         |                    |         |                    |         |
| Quarter 1                    | Ref.               |         | Ref.               |         | Ref.               |         |
| Quarter 2                    | 0.57(0.19, 1.75)   | 0.327   | 1.61(0.36, 7.12)   | 0.530   | 1.55(0.38, 6.33)   | 0.544   |
| Quarter 3                    | 0.60(0.22, 1.67)   | 0.330   | 0.41(0.04, 3.90)   | 0.438   | 0.35(0.04, 3.04)   | 0.339   |
| Quarter 4                    | 0.46(0.08, 2.80)   | 0.403   | *                  | *       | *                  | *       |
| P for trend                  |                    | 0.243   |                    | 0.464   |                    | 0.399   |

\* No observation.
